1 **Rab-mediated trafficking in the secondary cells of *Drosophila***  
2 **male accessory glands and its role in fecundity**

3

4 **Running title: Rab proteins and male fecundity**

5

6

7 E. Prince<sup>1, 2+</sup>, M. Brankatschk<sup>2+, 4</sup>, B. Kroeger<sup>3</sup>, D. Gligorov<sup>1, 5+</sup>, C. Wilson<sup>3</sup>, S. Eaton<sup>2, 4</sup>,  
8 F. Karch<sup>1\*</sup> and R.K. Maeda<sup>1\*</sup>

9

10 <sup>1</sup>: Department of Genetics and Evolution, Section of Biology, Sciences Faculty,  
11 *University of Geneva, Geneva, Switzerland*

12 <sup>2</sup>: Biotechnology Center of the TU Dresden, Dresden, Germany

13 <sup>3</sup>: Department of Physiology, Anatomy and Genetics, University of Oxford, Oxford,  
14 United Kingdom

15 <sup>4</sup>: Max Planck Institute of Molecular Cell Biology and Genetics, Dresden, Germany

16 <sup>5</sup>: The Hospital for Sick Children, Toronto, Ontario, Canada

17 <sup>+</sup>: Present address

18

19 \* Corresponding author

20 [robert.maeda@unige.ch](mailto:robert.maeda@unige.ch) (RKM)

21 [francois.karch@unige.ch](mailto:francois.karch@unige.ch) (FK)

22

23 **Key words:** *Drosophila melanogaster*, male accessory glands, post-mating response,  
24 confocal microscopy, vacuole-like compartments, Rab6, Rab19.

25

26 **Summary statements**

27

28 Secondary cells employ a previously unreported [Rab6-dependent] secretory system

29

## 30 **Abstract**

31

32 It is known that the male seminal fluid contains factors that affect female post-  
33 mating behavior and physiology. In *Drosophila*, most of these factors are secreted by  
34 the two epithelial cell types that make up the male accessory gland: the main and  
35 secondary cells. Although secondary cells represent only 4% of the cells of the  
36 accessory gland, their contribution to the male seminal fluid is essential for sustaining  
37 the female post-mating response. To better understand the function of the secondary  
38 cells, here we investigate their molecular organization, particularly with respect to the  
39 intracellular membrane transport machinery. We determined that large vacuole-like  
40 structures found in the secondary cells are trafficking hubs labeled by Rab6, 7, 11 and  
41 19. Furthermore, these cell-specific organelles are essential for the long-term post-  
42 mating behavior of females and that their formation is directly dependent upon Rab6.  
43 Our discovery adds to our understanding of Rab proteins function in secretory cells. We  
44 have created an online, open-access imaging resource as a valuable tool for the  
45 intracellular membrane and protein traffic community.

46

47

## 48 **Introduction**

49

50 Due to limited resources, sexual reproduction often leads to males having to  
51 compete to produce offspring in the succeeding generation (Agrawal, 2001; Andersson,  
52 1994; Birkhead and Møller, 1998; Darwin, 1871; Smith, 2012). Thus, many organisms  
53 have developed methods to ensure the propagation of an individual's genome at the  
54 expense of rivals (Clutton-Brock, 1989). For example, male polar bears often kill the  
55 offspring of rival males in order to favor the propagation of their own offspring (Lukas  
56 and Huchard, 2014). In *Drosophila melanogaster*, a more indirect "mate-guarding"  
57 strategy is used. The seminal fluid (SF) of *Drosophila* males contains factors, called  
58 seminal fluid proteins (SFPs), that are deposited into the female through mating  
59 (Wolfner, 1997, 2002). These factors influence the physiology and behavior of mated

60 females and, in that way, favor the reproductive success of a mating male (Avila et al.,  
61 2011; Wolfner, 1997, 2002). The male-induced changes in mated females are called the  
62 Post-Mating Response (PMR). Some characteristics of the PMR are: 1. decreased  
63 mating receptivity (Grillet et al., 2006; Gromko et al., 1984) ,2. reduced life span (Wigby  
64 and Chapman, 2005), 3. sperm storage (Adams and Wolfner, 2007; Ravi Ram and  
65 Wolfner, 2007; Wong et al., 2008), 4. increased ovulation (Heifetz et al., 2005;  
66 Rubinstein and Wolfner, 2013), 5. changed feeding behavior (Hussain et al., 2016) and  
67 6. gut remodeling (Reiff et al., 2015). Mate-guarding strategies are also described for  
68 mammals but the mechanistic principles are less well understood. For instance,  
69 changes are reported for the ovulation frequency and immune response activity of  
70 mated females (Bromfield, 2016; Bromfield et al., 2014).

71 While in mammals, SFPs are mostly produced in the prostate gland, the seminal  
72 vesicles and the bulbourethral gland, in *Drosophila* these proteins are primarily  
73 produced by a single gland called the male accessory gland (AG). The *Drosophila* AG is  
74 a two-lobed structure, made of two types of bi-nucleated and secretory cell types  
75 arranged in a cellular monolayer surrounding a central lumen and surrounded by a layer  
76 of muscle cells. The two types of secretory cells have been named the main cells (MCs)  
77 and the secondary cells (SCs). The polygonally-shaped MCs make up 96% of the  
78 secretory cells of the gland and are known to produce the vast majority of the SFPs  
79 (Chapman and Davies, 2004; Kalb et al., 1993). The remaining 4% of secretory cells  
80 are the SCs, which are located only at the distal tip of the glands, interspersed between  
81 MCs; they are much larger, spherically-shaped and contain a number of large vacuole-  
82 like compartments (VLCs) (Bairati, 1968; Bertram et al., 1992; Gligorov et al., 2013).  
83 These cells, like the MCs, are in direct contact with the glandular lumen and are able to  
84 contribute to the seminal fluid (Bairati, 1968; Corrigan et al., 2014; Gligorov et al., 2013;  
85 Leiblich et al., 2012; Minami et al., 2012; Redhai et al., 2016; Sitnik et al., 2016). Recent  
86 findings show that the SCs are not crucial for initiating early PMR behaviors. Instead SC  
87 products play a critical role in extending the female PMR past the initial 24-48 hours  
88 after mating (Corrigan et al., 2014; Gligorov et al., 2013; Minami et al., 2012; Redhai et  
89 al., 2016; Sitnik et al., 2016). Interestingly, mutations that affect SC differentiation also  
90 impede the formation of their VLCs. VLCs are prominent membrane-bound organelles

91 containing a large internal space. In mammals, VLCs have been implicated in different  
92 intracellular trafficking pathways such as endocytosis (Wada, 2013) or secretion  
93 (Jamieson and Palade, 1971).

94 Intracellular membrane and protein traffic is regulated by a family of membrane-  
95 associated, small GTPases called Rabs (Ras like bovine proteins). Since Rabs control  
96 individual trafficking sub-steps, these proteins are suitable to identify cellular membrane  
97 compartments (Bhuin and Roy, 2014; Hutagalung and Novick, 2011). Recently, a  
98 collection of YFP-tagged *rab* alleles was established in *Drosophila* (Dunst et al., 2015).  
99 This Rab library allows *in vivo* tracking and manipulation of the Rab proteins in any  
100 given cell type (Dunst et al., 2015).

101 Here, we use the Rab library to screen for the expression and localization of all  
102 *Drosophila* Rab proteins in the *Drosophila* AG. Focusing on the SCs, we show that  
103 Rab6, 7, 11 and 19 define four different VLC populations. This extends previous studies  
104 that showed that there were at least two different subclasses of VLCs using numerous  
105 intracellular markers (Bairati, 1968; Leiblich et al., 2012; Corrigan et al., 2014).  
106 Furthermore, we track the development of VLCs over the first few days after male  
107 eclosion and find that all founding VLCs that we detect are Rab6-positive, while Rab7-,  
108 Rab11- and Rab19-positive compartments appear later in adulthood, suggesting they  
109 may be Rab6-dependent. Consistent with this finding, the genetic reduction of Rab6  
110 prevents the formation of all VLC classes. However, the loss of Rab7 and 11 (Corrigan  
111 et al., 2014; Redhai et al., 2016), but not Rab19, also results in the loss of specific VLCs  
112 and change female PMR behaviors. Finally, we have established an online-based  
113 imaging platform (<https://flyrabag.genev.unige.ch>). This resource provides annotations  
114 based on a defined vocabulary for each expressed Rab protein in AG and allows 3D  
115 localization tracking down to subcellular resolutions. For the first time, the  
116 membrane/protein transport machinery of the AGs is comprehensively charted and our  
117 findings add valuable knowledge to the existing model describing the SC secretion  
118 system (Bairati, 1968; Bertram et al., 1992; Corrigan et al., 2014; Kalb et al., 1993;  
119 Leiblich et al., 2012; Redhai et al., 2016; Sitnik et al., 2016; Wilson et al., 2017)

120

121

## 122 **Results**

123

### 124 **The basic morphology of the accessory gland epithelium**

125 An ultrastructural study of the gland performed by Bairati in 1968 (Bairati, 1968)  
126 suggested that both AG cell types are polarized and secretory in nature. To confirm this  
127 notion, we examined the cellular localization of the canonical cell polarity markers, DE-  
128 Cadherin (DCAD, marking apical adherence junctions) and Disc-Large (Dlg, marking  
129 basolateral membrane), as well as the F-actin staining molecules, Phalloidin and  
130 Lifeactin (Schnorrer, 2011), in *Drosophila* AGs. Confirming the findings of Bairati, we  
131 find that the cells of the AG are indeed polarized, with their apical surface facing the  
132 central lumen (Figs 1B-1D). One striking characteristic of the cellular monolayer making  
133 up the AG regards the SCs. The SCs display a distinct round shape and seem to  
134 extrude out from the uniform sheet of MCs into the luminal space (Figs 1A-1B).  
135 However, even with this extrusion, they do not display a large exposed surface to the  
136 luminal fluid, as the MCs surrounding the SCs seem to extend over much of their  
137 surface to restrict contact with the lumen (Figs 1A & 1C) (Leiblich et al., 2012). This  
138 spreading of the MCs over the SCs also results in a large contact zone between the two  
139 cell types. Furthermore, we find a dense F-actin network concentrated along the apical  
140 surface of the SCs, with actin-filled membrane protrusions extending into the luminal  
141 space (Fig1D) (Bairati, 1968). This apical enrichment of F-actin is reminiscent of other  
142 secretory gland cells (eg. salivary gland cells) and may reflect the secretory nature of  
143 SCs (Dunst et al., 2015; Myat and Andrew, 2002).

144

### 145 **Secondary cells have different vacuole-like compartments**

146 Although VLCs are prominent in SCs (Bairati, 1968; Bertram et al., 1992; Gligorov et al.,  
147 2013), their molecular organization and function remains elusive. We hypothesized that  
148 VLCs could be a single trafficking compartment required for the efficient secretion of  
149 SFPs. To study the role of VLCs in membrane trafficking, we screened all expressed  
150 Rab proteins using the YRab-library (Dunst et al., 2015) (<http://rablibrary.mpi-cbg.de/>).  
151 To annotate the localization of each expressed Rab protein we used a defined

152 terminology (see Materials & Methods) and show multiple representative original  
153 confocal data sets at our CATMAID-based website (<https://flyrabag.genev.unige.ch>). In  
154 this way, users are able to navigate and track Rab compartments at subcellular  
155 resolution. Here, we will primarily focus on the Rab localization patterns in the SCs.  
156 Overall, we find that 16 of Rabs are expressed in SCs and that 4 of these Rabs are  
157 associated with VLCs: Rab6, 7, 11 and 19 (Fig 2, <https://flyrabag.genev.unige.ch>).

158

### 159 **Rab6 is associated with the *trans*-Golgi Network and VLCs**

160 Rab6 is known to localize within the *trans*-Golgi network (TGN) and to regulate protein  
161 and membrane traffic from the Golgi organelle to other membrane targets (Dunst et al.,  
162 2015; Iwanami et al., 2016; Satoh et al., 2016; Schotman and Rabouille, 2009). To test  
163 if VLCs are interconnected to the TGN, we probed *Yrab6* glands together with a battery  
164 of known Golgi-markers (Dunst et al., 2015; Harris, 2016; Rikhy and Lippincott-  
165 Schwartz, 2010). As expected, Rab6 is associated with the Golgi organelle in SCs (Fig  
166 3D). However, the appearance of the Golgi in SCs (Fig. S1A) is very different from the  
167 Golgi organelle in other cells (eg. MCs) (Bairati, 1968). In most *Drosophila* cell types,  
168 multiple Golgi units are dispersed and their build-up is primitive, consisting of a single  
169 *cis*-Golgi and *trans*-Golgi membrane sheet (Kondylis and Rabouille, 2003, 2009;  
170 Rabouille et al., 1999; Ripoche et al., 1994; Schotman and Rabouille, 2009). In SCs, we  
171 find that the Golgi forms a central, extended structure within the basal-medial area of  
172 the cell (Fig. S1A).

173 The VLCs bound by Rab6 ( $n_{\text{cell}}= 19$ ;  $n_{\text{VLCs/cell}}=6.37\pm 2.69$ ), however, display no Golgi  
174 signature (Fig 3D). Rab6-VLCs appear mainly in two areas: most are found in the basal-  
175 to-medial part of the cell along the plasma membrane, while other VLCs appear apically  
176 localized in the non-central (NC)-cytoplasmic and central regions of the cell (Figs 3A-  
177 3C, and Materials and Methods for location terminology). The distribution of Rab6 in  
178 SCs is somewhat similar to salivary gland (SG) cells, where Rab6 is found on Golgi but  
179 also on non-Golgi compartments (Dunst et al., 2015). Nevertheless, the extreme  
180 enlargement of all Rab6 compartments in the SCs and the more-differentiated  
181 morphology of the Golgi, point to extensive membrane/protein transport processes (Liu

182 and Storrie, 2012, 2015; Rodriguez-Boulan and Macara, 2014; Rodriguez-Boulan et al.,  
183 2005).

184 To test if Rab6-VLCs are involved in protein secretion, we expressed myristoylated  
185 fluorescent protein, Tomato (Tomato<sup>myr</sup>) (Pfeiffer, 2010), in *Yrab6* SCs. These results  
186 show that the cortical and NC-cytoplasmic Rab6-positive compartments are used to  
187 transport this reporter protein (Fig 3E). Thus, Rab6-VLCs are a route for secreted  
188 proteins.

189

### 190 **Rab19-labeled VLCs are dependent on *Rab7***

191 In SGs, Rab19 is found exclusively associated with the apical membrane (Dunst et al.,  
192 2015) . Although the biological role of Rab19 is poorly understood, Rab19 has been  
193 suggested to be involved in apical secretion (Dunst et al., 2015). We found that in AGs,  
194 Rab19 is strongly expressed in SCs and associated with VLCs (Fig 4,  $n_{\text{cell}}=13$ ,  
195  $n_{\text{VLCs}}/\text{cell}=6.08 \pm 2.93$ ). Surprisingly, none of the Rab19-VLCs shows Rab6 co-  
196 localization (Fig 2C) and only a small proportion of Tomato<sup>myr</sup> is trafficked in these  
197 compartments (Fig 4E). Of note, a small fraction of Rab19 is localized on Golgi  
198 membrane domains (Fig 4D). Based on these results, Rab19 may regulate another VLC  
199 traffic route, distinct from Rab6 transport.

200 Interestingly, we also found Rab7 associated with Rab6-negative VLCs in SCs ( $n_{\text{cell}}=8$ ,  
201  $n_{\text{VLCs}}/\text{cell}=4.38 \pm 3.34$ ). Rab7 is known to regulate late endosomal traffic (Fig. S2) and is  
202 enriched on lysosomes ((Bucci et al., 2000; Corrigan et al., 2014; Meresse et al., 1995).  
203 In addition, Rab7 is found on ER exit sites where it co-localizes with Rab1 (Caviglia et  
204 al., 2017). The association of Rab7 with ER/*cis*-Golgi membranes may indicate the  
205 formation of specialized Rab7 compartments that enter non-canonical trafficking routes  
206 (Caviglia et al., 2016). Thus, we speculated that Rab7 membranes might show an  
207 interrelation with Rab19-VLCs. To test our idea, we knocked down *Rab7*. Astonishingly,  
208 loss of Rab7 results in the complete depletion of Rab19- (Fig 6D'') but not Rab6-VLCs  
209 (Fig 6A''). On the other hand, loss of Rab19 changes the appearance of Rab7-VLCs but  
210 is not required for their existence (Fig 6B'''). We conclude, that Rab19 probably belongs  
211 to a Rab7-related endocytic traffic cascade in SCs.

212

## 213 **Rab11-VLCs partially overlap with Rab6 traffic**

214 Rab11 is generally associated with recycling endosomes (Bhuin and Roy, 2011, 2014;  
215 Casanova et al., 1999; Hutagalung and Novick, 2011; Ullrich et al., 1996) and is known  
216 to contribute to SC secretory activity (Corrigan et al., 2014; Redhai et al., 2016). Rab11-  
217 VLCs are mainly located near the plasma membrane (cortical) around the basal/medial  
218 and medial part of the SCs ( $n_{\text{cell}}=5$ ,  $n_{\text{VLCs}}/\text{cell}=9.4 \pm 2.7$ ). Rab11 also marks punctae,  
219 basally-to-medially enriched in the cytoplasmic compartment and punctae in the central  
220 area with an apical enrichment (Fig 5). Interestingly, Rab11 and Rab6 seem to be  
221 present on VLCs located in the same zone of the SCs (Figs 2B, 2D, 5D). To test if Rab6  
222 and 11 label the same VLCs, we probed AGs that express both Yrab11 and Crab6 (like  
223 Yrab6 but marked with CFP). We find that Rab6 and Rab11 do coexist on some, but not  
224 all VLC membranes (Fig 2B), suggesting that both of these VLCs may be involved in the  
225 same secretion pathway. To test this, we expressed Tomato<sup>myr</sup> in the SCs of *Crab6*;  
226 *Yrab11* males. Importantly, we find Tomato<sup>myr</sup> protein in CRab6- and CRab6/YRab11-  
227 VLCs, suggesting that Rab11 is another traffic checkpoint in the Rab6-aligned secretion  
228 pathway (Fig 5E, (Iwanami et al., 2016)).

229

## 230 **VLC formation and the female long-term PMR are Rab6-dependent**

231 Recent studies have shown that AGs require four days to reach full  
232 maturity/functionality (Ruhmann et al., 2016). To investigate if VLCs change their  
233 molecular identity in that developmental timeframe, we tracked the VLC formation in  
234 SCs over time (Fig. S3). Interestingly, one hour after eclosing, SCs show exclusively  
235 Rab6-VLCs. Later, at five hours post-eclosion, VLCs with Rab19 and VLCs with Rab11  
236 identity become visible. It is only after three days that Rab7-VLCs appear. Over the next  
237 two days, the VLCs continue to grow in size and number until five days post-eclosion,  
238 when the cells seem to reach a stable structure. These results, taken together with the  
239 functional data (Ruhmann et al., 2016), correlate the development of the VLCs with AG  
240 functionality in newly eclosed adult males (Ruhmann et al., 2016).

241 The association of specific Rabs to maturing VLCs begs the question of whether or not  
242 the Rabs are directly required for the formation of the VLCs and SC functionality.  
243 Previously, we have shown that the maintenance of the PMR is impaired in mutants that



244 lack VLCs filling their cytoplasm (Gligorov et al., 2013). Therefore, we chose to knock-  
245 down each candidate *Rab* individually in SCs and to assay VLC appearance and the  
246 female long-term PMR behavior. Strikingly, knocking down *Rab6* in the SCs leads to the  
247 disappearance of all VLCs in mature AGs (Figs 6A'-D' and Fig. S4, S5). It is interesting  
248 to note that smaller vesicles marked by Rab7, Rab11 and Rab19 are still present (Figs  
249 6B'-D') and that the Golgi-RFP marker still marks elements of a central channel (Fig.  
250 S5). Furthermore, Tomato<sup>myr</sup> production is not impaired in SCs lacking Rab6 and its  
251 membrane association indicates that Golgi post-translational modifications are still  
252 possible (data not shown). Thus, the loss of VLCs in the *Rab6* knockdown cannot  
253 simply be explained by either the absence of Rab7, 11 or 19 protein (Fig 6B'-D', S4), or  
254 the complete lack of Golgi apparatus (Fig. S5) and may be the result of a Rab6-VLC  
255 maturation process.

256 The loss of Rab6 in SCs also results in a dramatic decrease in the long-term but not  
257 short-term PMR (Figs 6E, 6H). Although the PMR starts normally, the mating-induced  
258 egg-laying stimulation (Fig 6E) and the reduction of secondary mating receptivity (Fig  
259 6H) is not sustained past the first two days post-mating. This is similar to the PMR seen  
260 in mates of *iab6<sup>COCU</sup>* mutant males who also lack SC VLCs ((Gligorov et al., 2013), Fig  
261 6E). Although the systematic functional analysis of *Rab11* was prevented due to general  
262 lethality, we were able to test for the effects of *Rab7* and *Rab19* knockdown.  
263 Knockdown of either *Rab* did not affect the formation of Rab6- (Figs 6A', 6D') or Rab11-  
264 VLCs (Figs 6A''', 6D'''). However, the absence of Rab7 in SCs prevents the formation of  
265 Rab19-VLCs and also changes the long-term PMR (Figs 6F, 6H). As the knockdown of  
266 *Rab19* does not affect the long-term PMR, we presume, that the effect of *Rab7*  
267 knockdown stems from a central endocytic block that impairs the general functionality of  
268 SCs (Corrigan et al., 2014). Following this interpretation, Rab19 may belong to an  
269 unrelated, more specialized trafficking pathway.

270

271

## 272 Discussion

273

274 Recent findings regarding the principles of intracellular protein/membrane  
275 trafficking have shown that different cell types show a surprising versatility with regards  
276 to their usage of the intracellular transport machinery. Although the Rab protein family  
277 regulates intracellular traffic steps, across different cell classes (*i.e.* epithelia), the  
278 composition, organization and trafficking function of Rab proteins often seems  
279 incomparable (Caviglia et al., 2017; Dunst et al., 2015; Fu et al., 2017). Therefore, it is  
280 vital to chart and understand intracellular trafficking pathways in as many suitable model  
281 systems as possible to describe general transport principles, like continuous or pulsed  
282 secretion (Caviglia et al., 2017; Dunst et al., 2015; Fu et al., 2017; Iwanami et al., 2016;  
283 Redhai et al., 2016).

284 Here, we describe the protein trafficking pathway organization of the SCs of the  
285 *Drosophila* male AGs and lay down a molecular foundation for Rab-dependent transport  
286 routes in this cell type. We and others found that SCs are embedded in a monolayer of  
287 primary cells (MCs) and that their apical side faces the central gland lumen (Bairati,  
288 1968; Corrigan et al., 2014; Leiblich et al., 2012; Redhai et al., 2016). However, it is  
289 interesting to note that the luminal membrane of SCs is highly restricted by the  
290 surrounding MCs and that there is a large apical SC/MC contact zone. These  
291 overlapping membranes may form an intercellular cavity and secreted proteins could be  
292 trapped between apical adherence and baso-lateral contact zones. Such a  
293 morphological feature is known to facilitate paracellular transport (Bökel et al., 2006;  
294 Marois et al., 2006; Wucherpfennig et al., 2003). If true, SCs are perfectly positioned to  
295 receive material from neighboring MCs and to secrete these products into the gland  
296 lumen. In support of this idea, it was reported that the SFP Ovulin is produced in MCs  
297 (Gligorov et al., 2013; Kalb et al., 1993) but is found in the SC VLCs. This finding  
298 implies that MC-produced Ovulin can be endocytosed by SCs for protein modification  
299 (Gligorov et al., 2013).

300 To investigate this possibility and others, we decided to describe the transport  
301 machinery of SCs with our main focus on the Rab proteins and the Golgi network. We  
302 found that most Rabs are expressed in SCs and we used a defined terminology to  
303 annotate their intracellular localization. Our data are presented in our open access  
304 online platform (<https://flyrabag.genev.unige.ch>) and the approach is complementary to

305 an already published online resource for other *Drosophila* cell types (Dunst et al., 2015)  
306 (<http://rablibrary.mpi-cbg.de/>).

307 One predominant intracellular compartment in SCs are VLCs (Bairati, 1968;  
308 Bertram et al., 1992; Gligorov et al., 2013). These membrane compartments are known  
309 to be critical for SC function (Corrigan et al., 2014; Gligorov et al., 2013; Redhai et al.,  
310 2016) and are suggested to be involved in the secretory transport route (Corrigan et al.,  
311 2014; Gligorov et al., 2013; Redhai et al., 2016). Indeed, Bairati and others have  
312 presented evidence indicating that these structures occasionally fuse with the plasma  
313 membrane to release their cargo (Bairati, 1968; Corrigan et al., 2014; Redhai et al.,  
314 2016). We found that, among the Rab proteins, only Rab 6, 7, 11 and 19 are associated  
315 with VLCs. Interestingly, these Rabs define distinct populations of VLCs and form after  
316 a maturation process that correlates with the time AGs need to assume their optimal  
317 biological functionality (Ruhmann et al., 2016).

318 Rab6 is a well-studied core Rab protein (Barr, 1999; Deretic and Papermaster,  
319 1993; Iwanami et al., 2016; Satoh et al., 2016; Schotman and Rabouille, 2009)  
320 associated with the TGN (Barr, 1999; Martinez et al., 1994) and is reported to regulate  
321 retrograde traffic from the Golgi to the ER (Bonifacino and Rojas, 2006; White et al.,  
322 1999) and transport destined for secretion (Iwanami et al., 2016; Januschke et al., 2007;  
323 Schotman and Rabouille, 2009). In SCs, we found Rab6 associated with the Golgi  
324 network as well as a subset of non-Golgi VLCs. The Golgi of the SCs forms an  
325 extended central structure, which is unusual for *Drosophila* cells. Most cell types in  
326 *Drosophila* possess many solitary Golgi organelles that consist of one *cis*-Golgi and one  
327 *trans*-Golgi membrane sheet (Kondylis and Rabouille, 2003, 2009; Rabouille et al.,  
328 1999; Ripoche et al., 1994). This organization is viewed as an evolutionary ancestor of  
329 the more complex mammalian Golgi-cisternae (Kondylis and Rabouille, 2009).  
330 However, the centralization of the Golgi in SCs may indicate a very high membrane  
331 traffic turn-over (Liu and Storrie, 2012) and may be consistent with the hypothesis that  
332 SCs are involved in the uptake of proteins of foreign origin (Gligorov et al., 2013).

333 The presence of Rab6 on non-Golgi compartments has also been reported for  
334 other secretory cells, like the cells of the SGs (Dunst et al., 2015; Iwanami et al., 2016).  
335 Interestingly, in SGs, Rab6 non-Golgi compartments are localized close to the apical

336 membrane and are thought to be involved in the apical secretion of saliva constituents  
337 (Dunst et al., 2015; Iwanami et al., 2016). We tested the possibility that Rab6-labelled  
338 VLCs are traffic checkpoints for secreted proteins by expressing the published reporter  
339 protein Tomato<sup>myr</sup> in SCs. Consistent with our hypothesis, Tomato<sup>myr</sup> co-localizes with  
340 non-Golgi Rab6-positive VLCs, indicating that Tomato<sup>myr</sup> is transported via these  
341 compartments. However, unlike in the SGs, Rab6 VLCs are not observed in close  
342 proximity to the apical plasma membrane, thus, it seems unlikely that the Rab6-positive  
343 VLCs are a final secretory compartment before apical secretion. More likely, Rab6 VLCs  
344 represent an early compartment on the route towards secretion. Surprisingly, we also  
345 found that some Rab6-positive VLCs are also marked by Rab11 domains. Rab11 is  
346 another core-Rab protein (Bhuin and Roy, 2014; Hutagalung and Novick, 2011) and has  
347 been shown to regulate multiple membrane recycling routes (Casanova et al., 1999;  
348 Ullrich et al., 1996). Examining the Tomato<sup>myr</sup> marker in lines expressing differentially  
349 tagged Rab6 and 11, we were able to show the secretion marker in both Rab6 and  
350 Rab6/11 VLCs. This is consistent with previous studies, where it was shown that  
351 ectopically-expressed Rab11 marks a subset of densely-filled vacuoles in SCs that  
352 contain secreted molecules like ANCE (Redhai et al., 2016; Rylett et al., 2007) and DPP  
353 (Redhai et al., 2016). Combining these results with our finding that knockdown of *Rab6*  
354 in SCs prevents the formation of Rab11 VLCs, we conclude that some Rab11 VLCs are  
355 probably downstream compartments involved in the same secretory pathway as Rab6.  
356 Lastly, in SCs, we found additional small Rab11-positive (but Rab6-negative) punctae in  
357 close proximity to the apical membrane suggesting other Rab11 roles in apical  
358 membrane recycling (Casanova et al., 1999; Dunst et al., 2015; Goldenring et al., 1996;  
359 Iwanami et al., 2016).

360 Rab19 is another Rab protein that localizes close to the apical membrane in  
361 *Drosophila* SGs (Dunst et al., 2015). Furthermore, *in vitro* interaction experiments have  
362 shown that Rab19 can interact with the apical adhesion molecule, Pollux, leading some  
363 to suggest a role for rab19 vesicles in apically directed secretion (Dunst et al., 2015;  
364 Gillingham et al., 2014; Zhang et al., 1996). Here, we show that Rab19 is strongly  
365 expressed and associated with apically localized VLCs, as well as a small portion of the  
366 Golgi apparatus. However, we were unable to show that Rab19 plays a role in apical

367 secretion in the SCs. In fact, Rab19 shows no overlap with Rab6-positive membranes  
368 and Tomato<sup>myr</sup> is not trafficked at high levels through Rab19-positive VLCs. Based on  
369 these findings, we speculated that Rab19 VLCs are probably not secretory in nature  
370 and tested their relation to the Rab7-positive VLCs. Rab7 and Rab19 VLCs appear only  
371 in matured SCs and the genetic reduction of Rab7 prevents the formation of Rab19-  
372 positive VLCs. By contrast, Rab19 depletion is not sufficient to suppress Rab7 VLCs.  
373 This string of evidence suggests that Rab19 VLCs differentiate directly from Rab7  
374 compartments originating from the *cis*-Golgi or endoplasmic reticulum (Bucci et al.,  
375 2000; Meresse et al., 1995). An alternative hypothesis that cannot be excluded is that  
376 Rab19 VLCs may descend from Rab11 (Rab6-negative) VLCs. To discriminate both  
377 possibilities, Rab11 depletion experiments are required. Unfortunately, the currently  
378 available tools do not allow such experiments in *Drosophila*. However, the fact that  
379 small portions of Rab19 and Rab7 are found within the Golgi organelle and that the  
380 appearance of Rab7 VLCs is dependent on Rab6, makes it tempting to speculate that a  
381 Rab7>Rab19 endocytic route may be required to recycle proteins originating from  
382 paracellular transport (Chan et al., 2011; White et al., 2015).

383 To assay the biological relevance of the different VLC populations we have  
384 assayed the female long-term PMR (Gligorov et al., 2013; Kubli and Bopp, 2012; Ravi  
385 Ram and Wolfner, 2007, 2009). The long-term PMR is never developed in females that  
386 were mated to mutant males containing SCs without VLCs (Gligorov et al., 2013). As  
387 expected for flies with SCs lacking VLCs, the knock down of *Rab6* in SCs prevents the  
388 formation of a meaningful long-term PMR of mated females. Interestingly, the knock  
389 down of *Rab7*, but not *Rab19* in male SCs also results in the loss of the female long-  
390 term PMR. As *Rab7* is required for proper Rab19 VLC formation, we originally thought  
391 that they would be part of the same pathway, and thus, share the same phenotype.  
392 While these two compartments may share some functions, with regards to the long-term  
393 PMR, this does not seem to be the case. Based on our results, we believe that the  
394 knock down of *Rab7* should block all endocytic traffic, and that this blockage may lead  
395 to the loss of long-term PMR through direct or indirect mechanisms. Indeed, this may be  
396 the case, as *Rab7* knockdown has been shown to ultimately lead to cell lethality in other  
397 systems (Brand and Perrimon, 1993; Chan et al., 2011, 2012; Chinchore et al., 2009).

398 On the other hand, the lack of PMR phenotypes in Rab19 deficient males again  
399 confirms that Rab19 is not part of the primary Rab6 VLC secretory traffic route.

400 We have shown that in male SCs Rab6 is required to establish and maintain two  
401 independent trafficking routes. Both transport pathways intersect each other at the Golgi  
402 apparatus, but only one, the Rab6/11 VLC branch seems to be essential to deliver  
403 factors for the seminal fluid to initiate a lasting PMR in mated females (Corrigan et al.,  
404 2014; Redhai et al., 2016). In addition to the work presented here, we have examined  
405 the entire Rab machinery in the AG along with a battery of additional protein markers  
406 that are accessible through our online resource (<https://flyrabag.genev.unige.ch>). This  
407 work should facilitate future studies on the AG and other studies involving protein  
408 transport, paracellular transport and the development/organization of membrane  
409 identities.

410

411

## 412 **Materials and Methods**

### 413 **Fly stocks**

414 Male collections were performed at 25°C. *D1-Gal4* was generated in the lab (Gligorov et  
415 al., 2013), YFP-tagged *rabs* (*Yrabs*) (Dunst et al., 2015), *UAS-Tomato-myristoylation* (Pfeiffer,  
416 2010), *UAS-Lifeactin-Ruby* (Schnorrer, 2011) and *UAS-Golgi-RFP* (Rikhy and Lippincott-  
417 Schwartz, 2010) lines were provided by S. Eaton's laboratory. *UAS-Rab6RNAi* (ID100774)  
418 (Keleman et al., 2009; Torres et al., 2014) and *UAS-Rab19RNAi* (ID103653) (Keleman et al.,  
419 2009) are available from Vienna *Drosophila* Resource Center and *UAS-Rab7RNAi* line was  
420 from M. Gonzalez-Gaitan's laboratory (University of Geneva) (Assaker et al., 2010; Dickson et  
421 al., 2007; Dietzl et al., 2007). Flies were raised at 25°C in tubes on standard yeast-glucose  
422 media (8.2% w/w yeast, 8.2% w/w glucose, 1% w/w agar, 1.2% v/w acid mix).

423

### 424 **Immunocytochemistry**

425 Accessory glands from 5-6 days-old males were dissected in ice-cold Grace's Insect  
426 Medium (BioConcept), fixed for 20 minutes with 4% Formaldehyde (Sigma) at room temperature  
427 and stained with one or more of the following antibodies over-night at 4°C: anti-Dlg  
428 (Developmental Studies Hybridoma Bank (DHSB)), anti-DE-cadherin (DHSB), or with

429 Phalloidin-546 (Life Technologies). All samples were mounted in Vectashield mounting medium  
430 with or without DAPI (Vector Labs). The pictures were taken with a Zeiss LSM700 confocal  
431 microscope and evaluated using the FIJI (Schindelin et al., 2012) (Laboratory of Optical and  
432 Computational Instrumentation (LOCI), University of Wisconsin-Madison, USA) and IMARIS  
433 softwares (Bitplane AG, Zurich, Switzerland).

434

## 435 **Live imaging**

436 Sample were dissected in ice-cold PBS and mounted in PBS onto a coverslip. Samples were  
437 imaged at approximately 20°C by an OMX V3 BLAZE microscope (GE Healthcare Life  
438 Sciences; Fig 2). Deconvolution algorithms were applied to the acquired wide-field images using  
439 the softWoRx 5.5 software package (GE Healthcare Life Sciences).

440

## 441 **Determination of the distribution of the YRab compartments in the** 442 **secondary cells**

443 The center of mass of the secondary cells was determined by using Fiji software (a  
444 secondary cells was surrounded by using “Freehand selection” and the center of mass was  
445 determined by “Measurements”) and a circle of 8.90µm diameter (*ie* average diameter of the  
446 apical surface of the secondary cells in contact with the lumen) was drawn by using FIJI  
447 software drawing tools; this circle corresponds to the “central” location. The “cortical” and “non-  
448 central cytoplasmic” location indicate that compartments are in close proximity to the cellular  
449 membrane or not, respectively. The three “Apical” (luminal side), “Medial” and “Basal” (stromal  
450 side) portions were determined by counting the number of z-slices covering the secondary cell  
451 height and this number was divided by three (Figs 1A-1A’, Fig. S6A).

452 The expression patterns of the Rab proteins have been described in the SCs from three  
453 to seven days-old males. Different terms will be used to describe different Rab-marked  
454 structures; we use “vacuole-like compartments” (VLCs) to refer to structures clearly delimited by  
455 a fluorescent membrane, whose diameter can vary from 0.3µm to 8µm. The term “small  
456 compartments” is used for features >0.5µm, which are homogeneously fluorescent, and  
457 “punctate” for distinct structures that are smaller than 0.5µm in diameter. Finally “diffuse” is used  
458 for spread out signal without visible particulate structures (Figs 2D, S2B, S6C).

459

## 460 **Receptivity and egg laying assays**

461 New-born virgin males from the different genotypes were put in fresh tubes with dry  
462 yeast and stored at 25°C for 5-7 days, 12/12 hours dark/light cycles. The same was done for  
463 virgin *Canton-S* (CS) females. On the day before the experiments, fresh tubes containing one  
464 virgin female collected 5 days before were set up and kept at 25°C. On the day of mating, one  
465 male was added per female-containing tube. For the tubes where mating occurred, the males  
466 were removed and the females were kept for receptivity and egg laying assays at 25°C.

467 Receptivity assay: Mated females were put in fresh tubes and 4 days after mating, one  
468 CS male was added into the tube. The tubes where mating occurs were counted, while for the  
469 tubes where the flies did not copulate, the males were removed and the tubes were kept for the  
470 next receptivity assay *ie* 10 days after the initial mating (6 days later).

471 Egg laying assay: single females were transferred every day in a fresh tube and the  
472 eggs laid were counted (over a period of 10 days).

473

474

## 475 **Acknowledgments**

476 We thank Dr. Marko Brankatschk and Prof. Suzanne Eaton for welcoming us into their  
477 laboratory and sharing the fly Rab library. We thank Dr. Siamak Redhai and Dr. Ian Dobbie  
478 (MICRON, Oxford) for help with live imaging of accessory glands. We thank Dr. Virginie Sabado  
479 and the members of Pr. Emi Nagoshi's laboratory for technical advice on sample preparation,  
480 microscopy and fly behavioral analysis. We thank the Bioimaging Center of the University of  
481 Geneva and the Micron Oxford Advanced Bioimaging Unit for microscopy facilities, Dr. Marko  
482 Brankatschk, the Karch's laboratory, Prof. Mariana Wolfner, Prof. Marcos Gonzalez-Gaitan and  
483 Prof. Jean Gruenberg for advice and support regarding this project. And finally we thank Dr.  
484 Dragan Gligorov for initiating this research project.

485 This work was supported by grants from the Donation Claraz, the State of Geneva, the Swiss  
486 National Fund for Research to FK, the BBSRC (BB/K017462/1) and the the Wellcome Trust  
487 (Strategic Award #091911 and 102347/Z/13/Z)

488

489

## 490 **References**



- 491 Adams, E.M., and Wolfner, M.F. (2007). Seminal Proteins But Not Sperm Induce Morphological  
492 Changes In The *Drosophila Melanogaster* Female Reproductive Tract During Sperm Storage. *J.*  
493 *Insect Physiol.* *53*, 319–331.
- 494 Agrawal, A.F. (2001). Sexual selection and the maintenance of sexual reproduction. *Nature* *411*,  
495 692.
- 496 Andersson, M. (1994). *Sexual selection* (Princeton, NJ: Princeton Univ. Press).
- 497 Assaker, G., Ramel, D., Wculek, S.K., González-Gaitán, M., and Emery, G. (2010). Spatial  
498 restriction of receptor tyrosine kinase activity through a polarized endocytic cycle controls border  
499 cell migration. *Proc. Natl. Acad. Sci. U. S. A.* *107*, 22558–22563.
- 500 Avila, F.W., Sirot, L.K., LaFlamme, B.A., Rubinstein, C.D., and Wolfner, M.F. (2011). *Insect*  
501 *Seminal Fluid Proteins: Identification and Function.* *Annu. Rev. Entomol.* *56*, 21–40.
- 502 Bairati, A. (1968). Structure And Ultrastructure Of The Male Reproductive System In *Drosophila*  
503 *Melanogaster*. *Monit. Zool. Ital. - Ital. J. Zool.* *2*, 105–182.
- 504 Barr, F.A. (1999). A novel Rab6-interacting domain defines a family of Golgi-targeted coiled-coil  
505 proteins. *Curr. Biol.* *9*, 381–384.
- 506 Bertram, M.J., Akerkar, G.A., Ard, R.L., Gonzalez, C., and Wolfner, M.F. (1992). Cell type-  
507 specific gene expression in the *Drosophila melanogaster* male accessory gland. *Mech. Dev.* *38*,  
508 33–40.
- 509 Bhui, T., and Roy, J.K. (2011). Rab11 is required for cell adhesion, maintenance of cell shape  
510 and actin-cytoskeleton organization during *Drosophila* wing development. *Int. J. Dev. Biol.* *55*,  
511 269–279.
- 512 Bhui, T., and Roy, J.K. (2014). Rab proteins: The key regulators of intracellular vesicle  
513 transport. *Exp. Cell Res.* *328*, 1–19.
- 514 Birkhead, T.R., and Møller, A.P. (1998). *Sperm competition and sexual selection* (Academic  
515 Press).
- 516 Bökel, C., Schwabedissen, A., Entchev, E., Renaud, O., and González-Gaitán, M. (2006). Sara  
517 Endosomes and the Maintenance of Dpp Signaling Levels Across Mitosis. *Science* *314*, 1135.

- 518 Bonifacino, J.S., and Rojas, R. (2006). Retrograde transport from endosomes to the trans-Golgi  
519 network. *Nat. Rev. Mol. Cell Biol.* 7, 568–579.
- 520 Brand, A.H., and Perrimon, N. (1993). Targeted gene expression as a means of altering cell  
521 fates and generating dominant phenotypes. *Development* 118, 401–415.
- 522 Bromfield, J.J. (2016). A role for seminal plasma in modulating pregnancy outcomes in domestic  
523 species. *Reproduction* 152, R223–R232.
- 524 Bromfield, J.J., Schjenken, J.E., Chin, P.Y., Care, A.S., Jasper, M.J., and Robertson, S.A.  
525 (2014). Maternal tract factors contribute to paternal seminal fluid impact on metabolic phenotype  
526 in offspring. *Proc. Natl. Acad. Sci. U. S. A.* 111, 2200–2205.
- 527 Bucci, C., Thomsen, P., Nicoziani, P., McCarthy, J., and van Deurs, B. (2000). Rab7: A Key to  
528 Lysosome Biogenesis. *Mol. Biol. Cell* 11, 467–480.
- 529 Casanova, J.E., Wang, X., Kumar, R., Bhartur, S.G., Navarre, J., Woodrum, J.E., Altschuler, Y.,  
530 Ray, G.S., and Goldenring, J.R. (1999). Association of Rab25 and Rab11a with the Apical  
531 Recycling System of Polarized Madin–Darby Canine Kidney Cells. *Mol. Biol. Cell* 10, 47–61.
- 532 Caviglia, S., Brankatschk, M., Fischer, E.J., Eaton, S., and Luschig, S. (2016). Staccato/Unc-  
533 13-4 controls secretory lysosome-mediated lumen fusion during epithelial tube anastomosis.  
534 *Nat. Cell Biol.* 18, 727.
- 535 Caviglia, S., Flores-Benitez, D., Lattner, J., Luschig, S., and Brankatschk, M. (2017). Rabs on  
536 the fly: Functions of Rab GTPases during development. *Small GTPases* 1–10.
- 537 Chan, C.-C., Scoggin, S., Wang, D., Cherry, S., Dembo, T., Greenberg, B., Jin, E.J., Kuey, C.,  
538 Lopez, A., Mehta, S.Q., et al. (2011). Systematic Discovery of Rab GTPases with Synaptic  
539 Functions in *Drosophila*. *Curr. Biol.* 21, 1704–1715.
- 540 Chan, C.-C., Scoggin, S., Hiesinger, P.R., and Buszczak, M. (2012). Combining recombineering  
541 and ends-out homologous recombination to systematically characterize *Drosophila* gene  
542 families: Rab GTPases as a case study. *Commun. Integr. Biol.* 5, 179–183.
- 543 Chapman, T., and Davies, S.J. (2004). Functions and analysis of the seminal fluid proteins of  
544 male *Drosophila melanogaster* fruit flies. *M Altstein* 25, 1477–1490.

- 545 Chinchore, Y., Mitra, A., and Dolph, P.J. (2009). Accumulation of rhodopsin in late endosomes  
546 triggers photoreceptor cell degeneration. *PLoS Genet.* 5, e1000377.
- 547 Clutton-Brock, T.H. (1989). Review Lecture: Mammalian mating systems. *Proc. R. Soc. Lond. B*  
548 *Biol. Sci.* 236, 339.
- 549 Corrigan, L., Redhai, S., Leiblich, A., Fan, S.-J., Perera, S.M., Patel, R., Gandy, C., Wainwright,  
550 S.M., Morris, J.F., Hamdy, F., et al. (2014). BMP-regulated exosomes from *Drosophila* male  
551 reproductive glands reprogram female behavior. *J. Cell Biol.* 206, 671–688.
- 552 Darwin, C.R. (1871). *The descent of man and selection in relation to sex* (London: John  
553 Murray).
- 554 Deretic, D., and Papermaster, D.S. (1993). Rab6 is associated with a compartment that  
555 transports rhodopsin from the trans-Golgi to the site of rod outer segment disk formation in frog  
556 retinal photoreceptors. *J. Cell Sci.* 106, 803–813.
- 557 Dickson, B., Dietzl, G., Keleman, K., and VDRC project members, ?. (2007). RNAi construct and  
558 insertion data submitted by the Vienna *Drosophila* RNAi Center.
- 559 Dietzl, G., Chen, D., Schnorrer, F., Su, K.C., Barinova, Y., Fellner, M., Gasser, B., Kinsey, K.,  
560 Oettel, S., Scheiblaue, S., et al. (2007). Supplementary Table 1. *Nature* 448.
- 561 Dunst, S., Kazimiers, T., von Zadow, F., Jambor, H., Sagner, A., Brankatschk, B., Mahmoud, A.,  
562 Spann, S., Tomancak, P., Eaton, S., et al. (2015). Endogenously Tagged Rab Proteins: A  
563 Resource to Study Membrane Trafficking in *Drosophila*. *Dev. Cell* 33, 351–365.
- 564 Fu, Y., Zhu, J., Zhang, F., Richman, A., Zhao, Z., and Han, Z. (2017). Comprehensive functional  
565 analysis of Rab GTPases in *Drosophila* nephrocytes. *Cell Tissue Res.* 368, 615–627.
- 566 Gillingham, A.K., Sinka, R., Torres, I.L., Lilley, K.S., and Munro, S. (2014). Toward a  
567 Comprehensive Map of the Effectors of Rab GTPases. *Dev. Cell* 31, 358–373.
- 568 Gligorov, D., Sitnik, J.L., Maeda, R.K., Wolfner, M.F., and Karch, F. (2013). A Novel Function for  
569 the Hox Gene *Abd-B* in the Male Accessory Gland Regulates the Long-Term Female Post-  
570 Mating Response in *Drosophila*. *PLoS Genet.* 9, e1003395.

- 571 Goldenring, J.R., Smith, J., Vaughan, H.D., Cameron, P., Hawkins, W., and Navarre, J. (1996).  
572 Rab11 is an apically located small GTP-binding protein in epithelial tissues. *Am. J. Physiol. -*  
573 *Gastrointest. Liver Physiol.* *270*, G515.
- 574 Grillet, M., Dartevelle, L., and Ferveur, J.-F. (2006). A *Drosophila* male pheromone affects  
575 female sexual receptivity. *Proc. R. Soc. Lond. B Biol. Sci.* *273*, 315–323.
- 576 Gromko, M.H., Newport, M.E.A., and Kortier, M.G. (1984). Sperm dependence of female  
577 receptivity to remating in *Drosophila melanogaster*. *Evolution* *38*, 1273–1282.
- 578 Harris, T. (2016). Harris insertions.
- 579 Heifetz, Y., Vandenberg, L.N., Cohn, H.I., and Wolfner, M.F. (2005). Two cleavage products of  
580 the *Drosophila* accessory gland protein ovulin can independently induce ovulation. *Proc. Natl.*  
581 *Acad. Sci. U. S. A.* *102*, 743–748.
- 582 Hussain, A., Üçpunar, H.K., Zhang, M., Loschek, L.F., and Grunwald Kadow, I.C. (2016).  
583 Neuropeptides Modulate Female Chemosensory Processing upon Mating in *Drosophila*. *PLoS*  
584 *Biol.* *14*, e1002455.
- 585 Hutagalung, A.H., and Novick, P.J. (2011). Role of Rab GTPases in Membrane Traffic and Cell  
586 Physiology. *Physiol. Rev.* *91*, 119–149.
- 587 Iwanami, N., Nakamura, Y., Satoh, T., Liu, Z., and Satoh, A.K. (2016). Rab6 Is Required for  
588 Multiple Apical Transport Pathways but Not the Basolateral Transport Pathway in *Drosophila*  
589 Photoreceptors. *PLOS Genet.* *12*, 1–26.
- 590 Jamieson, J.D., and Palade, G.E. (1971). Condensing Vacuole Conversion And Zymogen  
591 Granule Discharge In Pancreatic Exocrine Cells: Metabolic Studies. *J. Cell Biol.* *48*, 503–522.
- 592 Januschke, J., Nicolas, E., Compagnon, J., Formstecher, E., Goud, B., and Guichet, A. (2007).  
593 Rab6 and the secretory pathway affect oocyte polarity in *Drosophila*. *Development* *134*, 3419–  
594 3425.
- 595 Kalb, J.M., DiBenedetto, A.J., and Wolfner, M.F. (1993). Probing the function of *Drosophila*  
596 *melanogaster* accessory glands by directed cell ablation. *Proc. Natl. Acad. Sci. U. S. A.* *90*,  
597 8093–8097.

- 598 Keleman, K., Micheler, T., and VDRC project members (2009). RNAi-phiC31 construct and  
599 insertion data submitted by the Vienna Drosophila RNAi Center.
- 600 Kondylis, V., and Rabouille, C. (2003). A novel role for dp115 in the organization of tER sites in  
601 Drosophila. *J. Cell Biol.* *162*, 185–198.
- 602 Kondylis, V., and Rabouille, C. (2009). The Golgi apparatus: lessons from Drosophila. *FEBS*  
603 *Lett.* *583*, 3827–3838.
- 604 Kubli, E., and Bopp, D. (2012). Sexual Behavior: How Sex Peptide Flips the Postmating Switch  
605 of Female Flies. *Curr. Biol.* *22*, R520–R522.
- 606 Leiblich, A., Marsden, L., Gandy, C., Corrigan, L., Jenkins, R., Hamdy, F., and Wilson, C.  
607 (2012). Bone morphogenetic protein- and mating-dependent secretory cell growth and migration  
608 in the Drosophila accessory gland. *Proc. Natl. Acad. Sci.* *109*, 19292–19297.
- 609 Liu, S., and Storrie, B. (2012). Are Rab Proteins the Link Between Golgi Organization and  
610 Membrane Trafficking? *Cell. Mol. Life Sci. CMLS* *69*, 4093–4106.
- 611 Liu, S., and Storrie, B. (2015). How Do Rab Proteins Determine Golgi Structure? *Int. Rev. Cell*  
612 *Mol. Biol.* *315*, 1–22.
- 613 Lukas, D., and Huchard, E. (2014). The evolution of infanticide by males in mammalian  
614 societies. *Science* *346*, 841.
- 615 Marois, E., Mahmoud, A., and Eaton, S. (2006). The endocytic pathway and formation of the  
616 Wingless morphogen gradient. *Development* *133*, 307–317.
- 617 Martinez, O., Schmidt, A., Salaméro, J., Hoflack, B., Roa, M., and Goud, B. (1994). The small  
618 GTP-binding protein rab6 functions in intra-Golgi transport. *J. Cell Biol.* *127*, 1575–1588.
- 619 Meresse, S., Gorvel, J.P., and Chavrier, P. (1995). The rab7 GTPase resides on a vesicular  
620 compartment connected to lysosomes. *J. Cell Sci.* *108*, 3349.
- 621 Minami, R., Wakabayashi, M., Sugimori, S., Taniguchi, K., Kokuryo, A., Imano, T., Adachi-  
622 Yamada, T., Watanabe, N., and Nakagoshi, H. (2012). The Homeodomain Protein Defective  
623 Proventriculus Is Essential for Male Accessory Gland Development to Enhance Fecundity in  
624 Drosophila. *PLoS ONE* *7*, e32302.

- 625 Myat, M.M., and Andrew, D.J. (2002). Epithelial Tube Morphology Is Determined by the  
626 Polarized Growth and Delivery of Apical Membrane. *Cell* *111*, 879–891.
- 627 Pfeiffer, B. (2010). Pfeiffer constructs.
- 628 Rabouille, C., Kuntz, D.A., Lockyer, A., Watson, R., Signorelli, T., Rose, D.R., van den Heuvel,  
629 M., and Roberts, D.B. (1999). The *Drosophila* GMII gene encodes a Golgi alpha-mannosidase  
630 II. *J. Cell Sci.* *112*, 3319.
- 631 Ravi Ram, K., and Wolfner, M.F. (2007). Sustained Post-Mating Response in *Drosophila*  
632 *melanogaster* Requires Multiple Seminal Fluid Proteins. *PLoS Genet.* *3*, e238.
- 633 Ravi Ram, K., and Wolfner, M.F. (2009). A network of interactions among seminal proteins  
634 underlies the long-term postmating response in *Drosophila*. *Proc. Natl. Acad. Sci. U. S. A.* *106*,  
635 15384–15389.
- 636 Redhai, S., Hellberg, J.E.E.U., Wainwright, M., Perera, S.W., Castellanos, F., Kroeger, B.,  
637 Gandy, C., Leiblich, A., Corrigan, L., Hilton, T., et al. (2016). Regulation of Dense-Core Granule  
638 Replenishment by Autocrine BMP Signalling in *Drosophila* Secondary Cells. *PLoS Genet.* *12*,  
639 e1006366.
- 640 Reiff, T., Jacobson, J., Cognigni, P., Antonello, Z., Ballesta, E., Tan, K.J., Yew, J.Y.,  
641 Dominguez, M., and Miguel-Aliaga, I. (2015). Endocrine remodelling of the adult intestine  
642 sustains reproduction in *Drosophila*. *ELife* *4*, e06930.
- 643 Rikhy, R., and Lippincott-Schwartz, J. (2010). P{UASp-RFP.Golgi} construct and insertions.
- 644 Ripoche, J., Link, B., Yucel, J.K., Tokuyasu, K., and Malhotra, V. (1994). Location of Golgi  
645 membranes with reference to dividing nuclei in syncytial *Drosophila* embryos. *Proc. Natl. Acad.*  
646 *Sci. U. S. A.* *91*, 1878–1882.
- 647 Rodriguez-Boulan, E., and Macara, I.G. (2014). Organization and execution of the epithelial  
648 polarity programme. *Nat. Rev. Mol. Cell Biol.* *15*, 225–242.
- 649 Rodriguez-Boulan, E., Kreitzer, G., and Müsch, A. (2005). Organization of vesicular trafficking in  
650 epithelia. *Nat. Rev. Mol. Cell Biol.* *6*, 233.

- 651 Rubinstein, C.D., and Wolfner, M.F. (2013). *Drosophila* seminal protein ovulin mediates  
652 ovulation through female octopamine neuronal signaling. *Proc. Natl. Acad. Sci. U. S. A.* *110*,  
653 17420–17425.
- 654 Ruhmann, H., Wensing, K.U., Neuhalfen, N., Specker, J.-H., and Fricke, C. (2016). Early  
655 reproductive success in *Drosophila* males is dependent on maturity of the accessory gland.  
656 *Behav. Ecol.* *27*, 1859–1868.
- 657 Rylett, C.M., Walker, M.J., Howell, G.J., Shirras, A.D., and Isaac, R.E. (2007). Male accessory  
658 glands of *Drosophila melanogaster* make a secreted angiotensin I-converting enzyme (ANCE),  
659 suggesting a role for the peptide-processing enzyme in seminal fluid. *J. Exp. Biol.* *210*, 3601.
- 660 Satoh, T., Nakamura, Y., and Satoh, A.K. (2016). Rab6 functions in polarized transport in  
661 *Drosophila* photoreceptors. *Fly (Austin)* *10*, 123–127.
- 662 Schindelin, J., Arganda-Carreras, I., Frise, E., Kaynig, V., Longair, M., Pietzsch, T., Preibisch,  
663 S., Rueden, C., Saalfeld, S., Schmid, B., et al. (2012). Fiji - an Open Source platform for  
664 biological image analysis. *Nat. Methods* *9*, 10.1038/nmeth.2019.
- 665 Schnorrer, F. (2011). P{UAS-Lifeact-GFP}VIE-260B, P{attP,y[+],w[3']}VIE-19A & P{UAS-Lifeact-  
666 Ruby}VIE-19A.
- 667 Schotman, H., and Rabouille, C. (2009). The exocytic pathway and development. In *Trafficking*  
668 *Inside Cells*, (Springer), pp. 419–438.
- 669 Sitnik, J.L., Gligorov, D., Maeda, R.K., Karch, F., and Wolfner, M.F. (2016). The Female Post-  
670 Mating Response Requires Genes Expressed in the Secondary Cells of the Male Accessory  
671 Gland in *Drosophila melanogaster*. *Genetics* *202*, 1029.
- 672 Smith, R.L. (2012). *Sperm competition and the evolution of animal mating systems* (Elsevier).
- 673 Torres, I.L., Rosa-Ferreira, C., and Munro, S. (2014). The Arf family G protein Arl1 is required  
674 for secretory granule biogenesis in *Drosophila*. *J. Cell Sci.* *127*, 2151–2160.
- 675 Ullrich, O., Reinsch, S., Urbé, S., Zerial, M., and Parton, R.G. (1996). Rab11 regulates recycling  
676 through the pericentriolar recycling endosome. *J. Cell Biol.* *135*, 913.

- 677 Wada, Y. (2013). Vacuoles in mammals: A subcellular structure indispensable for early  
678 embryogenesis. *Bioarchitecture* 3, 13–19.
- 679 White, I., Joseph A., Anderson, E., Zimmerman, K., Zheng, K.H., Rouhani, R., and  
680 Gunawardena, S. (2015). Huntingtin differentially regulates the axonal transport of a sub-set of  
681 Rab-containing vesicles in vivo. *Hum. Mol. Genet.* 24, 7182–7195.
- 682 White, J., Johannes, L., Mallard, F., Girod, A., Grill, S., Reinsch, S., Keller, P., Tzschaschel, B.,  
683 Echard, A., and Goud, B. (1999). Rab6 coordinates a novel Golgi to ER retrograde transport  
684 pathway in live cells. *J. Cell Biol.* 147, 743–760.
- 685 Wigby, S., and Chapman, T. (2005). Sex peptide causes mating costs in female *Drosophila*  
686 *melanogaster*. *Curr. Biol.* 15, 316–321.
- 687 Wilson, C., Leiblich, A., Goberdhan, D., and Hamdy, F. (2017). Chapter Eleven: The *Drosophila*  
688 Accessory Gland as a Model for Prostate Cancer and Other Pathologies. *Curr. Top. Dev. Biol.*  
689 121, 339–375.
- 690 Wolfner, M.F. (1997). Tokens of love: Functions and regulation of *drosophila* male accessory  
691 gland products. *Insect Biochem. Mol. Biol.* 27, 179–192.
- 692 Wolfner, M.F. (2002). The gifts that keep on giving: physiological functions and evolutionary  
693 dynamics of male seminal proteins in *Drosophila*. *Heredity* 88, 85–93.
- 694 Wong, A., Albright, S.N., Giebel, J.D., Ram, K.R., Ji, S., Fiumera, A.C., and Wolfner, M.F.  
695 (2008). A Role for Acp29AB, a Predicted Seminal Fluid Lectin, in Female Sperm Storage in  
696 *Drosophila melanogaster*. *Genetics* 180, 921–931.
- 697 Wucherpennig, T., Wilsch-Bräuninger, M., and González-Gaitán, M. (2003). Role of *Drosophila*  
698 Rab5 during endosomal trafficking at the synapse and evoked neurotransmitter release. *J. Cell*  
699 *Biol.* 161, 609.
- 700 Zhang, S.D., Kassis, J., Olde, B., Mellerick, D.M., and Odenwald, W.F. (1996). Pollux, a novel  
701 *Drosophila* adhesion molecule, belongs to a family of proteins expressed in plants, yeast,  
702 nematodes, and man. *Genes Dev.* 10, 1108–1119.
- 703
- 704



## 705 **Figure legends**

706

### 707 **Figure 1. Organization of the Secondary cells.**

708 (A and A') Schematic depiction of a secondary (SC, light blue) and flanking main cells  
709 (MCs, magenta). SC cells are embedded in MCs. We divided SCs into three zones: Apical,  
710 Medial and Basal (A, sagittal view). The apical, luminal contact zone of SCs is very small (A',  
711 top-view, magenta).

712 (B) Confocal images from the distal tip of an AG are assembled into a 3D projection down  
713 the long axis of the gland. GFP (green) expressing SCs are probed for Dlg (cyan), F-actin (light-  
714 grey) and DAPI (dark blue). Scale bar = 15 $\mu$ m.

715 (C) Compressed confocal stack (15 $\mu$ m from apical to basal) shows a SC (outlined by a white  
716 dashed line) probed for DCAD (cyan) and Dlg (magenta). Surrounding main cells (MCs) are  
717 indicated, scale bar = 5 $\mu$ m.

718 (D) A confocal slice along the apical-basal axis of a representative SC (outlined with a  
719 dashed line) expressing the F-actin marker, Lifeactin-Ruby (red), and stained with DAPI (blue).  
720 The apical side of the cell is at the top left and the basal side is at the bottom right. Note the  
721 enrichment of actin filaments at the apical membrane that is facing the AG lumen. Scale bar =  
722 5 $\mu$ m.

723

### 724 **Figure 2. The Rabs associated with VLCs**

725 (A-C'') Shown are individual wide-field fluorescence microscopy slices (0.8 $\mu$ m slices) of SCs at  
726 three levels along the apical-basal axis (A-A'' Apical; B-B'' Basal; C-C'' Apical) from *Crab6*;  
727 *Yrab7*, *Crab6*; *Yrab11* or *Crab6*; *Yrab19* flies. Non-fixed AGs were visualized for YFP (yellow; A,  
728 B, C) and CFP (cyan; A', B', C') fluorescence. Asterisks indicate labeled VLCs (orange, *Yrab7*;  
729 pink, *Crab6*; light blue, *Yrab11*; grey, *Yrab19*; white, for VLCs in the merged images that co  
730 express two Rabs), scale bars = 5 $\mu$ m.

731 (D) Plotted is the relative position and abundance of VLCs labelled by one Rab in SC cells;  
732 color code and symbols are annotated in the legend (right box). Each circle indicates  
733 approximate proportion of the vacuoles (based on the average proportion of vacuoles labeled  
734 per cell) labeled by the particular rab in the indicated zone (Rab6,  $n_{\text{cell}}=19$ ,  $n_{\text{VLCs}}/\text{cell}=6.37 \pm$   
735  $2.69$ ; Rab7,  $n_{\text{cell}}=8$ ,  $n_{\text{VLCs}}/\text{cell}=4.38 \pm 3.34$ ; Rab11,  $n_{\text{cell}}=5$ ,  $n_{\text{VLCs}}/\text{cell}=9.4 \pm 2.7$ ; Rab19,  
736  $n_{\text{cell}}=13$ ,  $n_{\text{VLCs}}/\text{cell}=6.08 \pm 2.93$ ). Abbreviations: Cort = Cortical; NC-Cyto = Non-Central

737 Cytoplasmic; Cent = Central. A key to the symbols used in all schematic representations of Rab  
738 localization is present next to this plot (not all symbols are used in this plot). The percentage  
739 indications for each structure are defined as follows: for the punctate and small compartments  
740 the percentages indicate that the particular structure in that zone makes up, on average, the  
741 indicated percentage of the total Rab labeling in a cell (average of percentages from n cells).  
742 For the diffuse and central mass, the percentages indicate the percentage of cells (n) with that  
743 structure in that zone (Rab6,  $n_{\text{cell}}=19$ ; Rab7,  $n_{\text{cell}}=8$ ; Rab11,  $n_{\text{cell}}=5$ ; Rab19,  $n_{\text{cell}}=13$ ).

744

### 745 **Figure 3. Organization of Rab6 membranes in SCs**

746 (A, B) Shown is a Z-projection (A, 15 $\mu\text{m}$ ; Medial; top-view) and a confocal reconstruction of a  
747 sagittal section from the same confocal stack (B, 0.8 $\mu\text{m}$ ; sagittal-view) of a Yrab6 SC probed for  
748 DAPI (blue) and YFP (green). Pink asterisks indicate Yrab6-VLCs, scale bars = 5 $\mu\text{m}$ , arrow  
749 shows the apical-basal cell orientation (B).

750 (C) Plotted is the position and relative abundance of Rab6-positive compartments. Color  
751 code and symbols are explained in Figure 2D (right box and legend) ( $n_{\text{cell}}=19$ ).

752 (D-E") Shown are confocal slices of single SCs (0.8 $\mu\text{m}$  thick slices; D-D" Medial; E-E" Medial)  
753 from *Yrab6; D1>>golgiRFP* (D-D") and *Yrab6; D1>>tomato<sup>myr</sup>* (E-E") flies. AGs were probed for  
754 YFP (green), DAPI (dark blue) and RFP/Tomato (magenta). Asterisks indicate labelled VLCs  
755 (pink, Yrab6; red, Tomato/RFP markers; white and white arrows, for colocalization), scale bars =  
756 5 $\mu\text{m}$ .

757

### 758 **Figure 4. Organization of Rab19 membranes in SCs**

759 (A, B) Shown is a Z-projection (A, 15 $\mu\text{m}$ ; Medial; top-view) and a confocal reconstruction of a  
760 sagittal section from the same confocal stack (B, 0.8 $\mu\text{m}$ ; sagittal-view) of a Yrab19 SC probed  
761 for DAPI (blue) and YFP (green). Grey asterisks indicate Yrab19-VLCs, scale bars = 5 $\mu\text{m}$ , arrow  
762 shows the apical-basal cell orientation (B).

763 (C) Plotted is the position and relative abundance of Rab19-positive compartments. Color  
764 code and symbols are explained in Figure 2D (right box and legend) ( $n_{\text{cell}}=13$ ).

765 (D-E") Shown are confocal slices of single SCs (0.8 $\mu\text{m}$  thick sections; D-D" Apical; E-E" Apical)  
766 from *Yrab19; D1>>golgiRFP* (D-D"), and *Yrab19; D1>>tomato<sup>myr</sup>* (E-E") flies. AGs were probed  
767 for YFP (green), DAPI (dark blue) and RFP/Tomato (magenta). Asterisks indicate labelled VLCs  
768 (grey, Yrab19; red, Tomato/RFP markers; white, for colocalization), scale bars = 5 $\mu\text{m}$ .

769

### 770 **Figure 5. Organization of Rab11 membranes in SCs**

771 (A, B) Shown is a Z-projection (A, 15 $\mu$ m; Medial; top-view) and a confocal reconstruction of a  
772 sagittal section from the same confocal stack (B, 0.8 $\mu$ m; sagittal-view) of a Yrab11 SC probed  
773 for DAPI (blue) and YFP (green). Light blue asterisks indicate Yrab11-VLCs, scale bars = 5 $\mu$ m,  
774 arrow shows the apical-basal cell orientation (B).

775 (C) Plotted is the position and relative abundance of Rab11-positive compartments. Color  
776 code and symbols are explained in Figure 2D (right box and legend) ( $n_{\text{cell}}=5$ ).

777 (D-E'') Shown are confocal slices of single SCs (0.8 $\mu$ m thick sections; D-D'' Basal; E-E'' Basal)  
778 from *Yrab11; D1>>golgiRFP* (D-D'') and *Crab6; Yrab11, D1>>tomato<sup>myr</sup>* (E-E'') flies. AGs were  
779 probed for YFP (green), CFP (cyan) and RFP/Tomato (magenta). Asterisks indicate labelled  
780 VLCs (light blue, Yrab11; red, Tomato marker; pink, Crab6; white, for colocalization), scale bars  
781 = 5 $\mu$ m. In (E''). A VLC marked by the Crab6, Yrab11 and *tomato<sup>myr</sup>* is indicated by a white  
782 asterisk (E'').

783

#### 784 **Figure 6. Rab6 is instructive for VLC formation and the female PMR**

785 (A-D''') Shown are confocal slices (0.8 $\mu$ m thick sections; top-view; A-A''', Medial; B-B''', and D-  
786 D''', Apical; C-C''', Basal) of SCs from *Yrab6* (A), *Yrab6;D1>>rab6<sup>RNAi</sup>* (A'), *Yrab6;D1>>rab7<sup>RNAi</sup>*  
787 (A''), *Yrab6;D1>>rab19<sup>RNAi</sup>* (A'''), *Yrab7* (B), *Yrab7;D1>>rab6<sup>RNAi</sup>* (B'), *Yrab7;D1>>rab7<sup>RNAi</sup>* (B''),  
788 *Yrab7;D1>>rab19<sup>RNAi</sup>* (B'''), *Yrab11* (C), *Yrab11;D1>>rab6<sup>RNAi</sup>* (C'), *Yrab11;D1>>rab7<sup>RNAi</sup>* (C''),  
789 *Yrab11;D1>>rab19<sup>RNAi</sup>* (C'''), *Yrab19* (D), *Yrab19;D1>>rab6<sup>RNAi</sup>* (D'), *Yrab19;D1>>rab7<sup>RNAi</sup>* (D'')  
790 and *Yrab19;D1>>rab19<sup>RNAi</sup>* (D''') flies. AGs were probed for YFP (yellow), Dlg (magenta) and  
791 DAPI (blue). Scale bars = 5 $\mu$ m.

792 (E-G) Plotted are the number of eggs laid over a ten-day period for *wild-type* females mated  
793 with males of following genotypes: *D1>Gal4* and *Canton-S* (control, black broken line), *iab6<sup>coCu</sup>*  
794 (blue broken line), *D1>>rab6<sup>RNAi</sup>* (E, pink), *D1>>rab7<sup>RNAi</sup>* (F, orange), *D1>>rab19<sup>RNAi</sup>* (G, grey).  
795 Standard error of the mean is indicated. Statistics, \*,  $p<0.05$ ; \*\*,  $p<0.01$ ; \*\*\*\* $p<0.00001$ ; Mann-  
796 Whitney U test.

797 (H) Shown is the re-mating frequency (in %) of *wild-type* females, previously mated with  
798 males of following genotypes: *D1>>GFP* (control, black), *D1>>rab6<sup>RNAi</sup>* (pink), *D1>>rab7<sup>RNAi</sup>*  
799 (orange), *D1>>rab19<sup>RNAi</sup>* (grey). The males used for the secondary matings are *wild-type*. AFM  
800 indicates time after the initial mating, error bars indicate standard error of the mean. Statistics, \*,  
801  $p<0.05$ ; \*\*,  $p<0.01$ ; \*\*\*\* $p<0.00001$ ; Mann-Whitney U test.

802

803

804

**Fig 1. Organization of the Secondary cells**

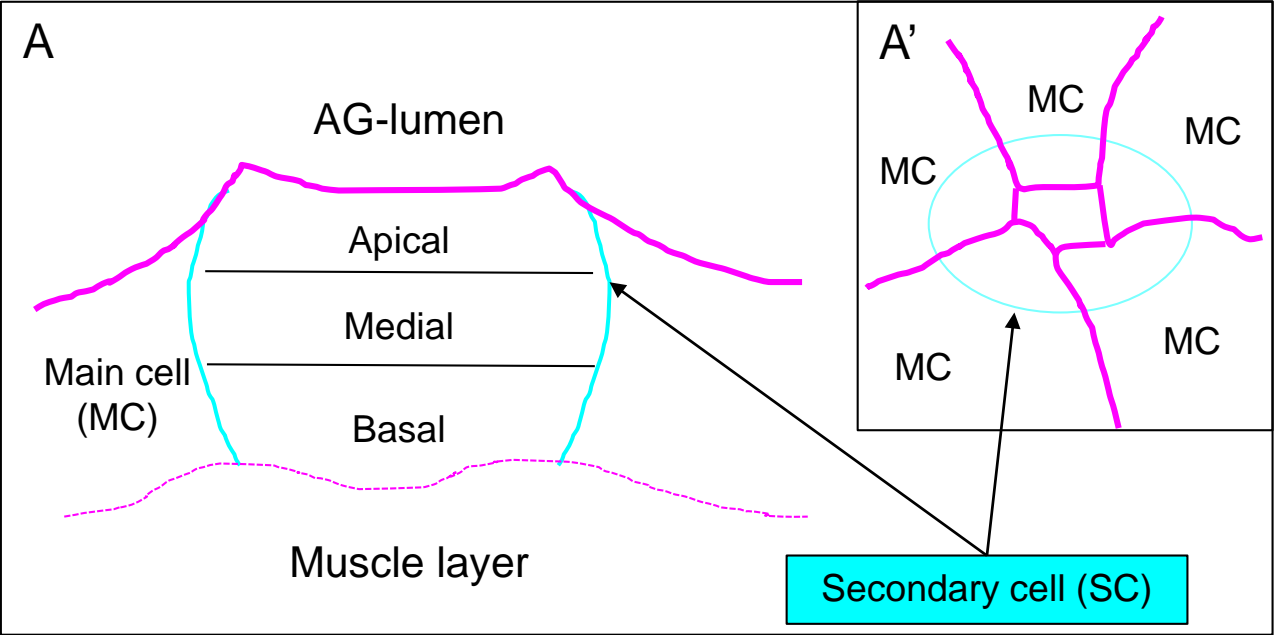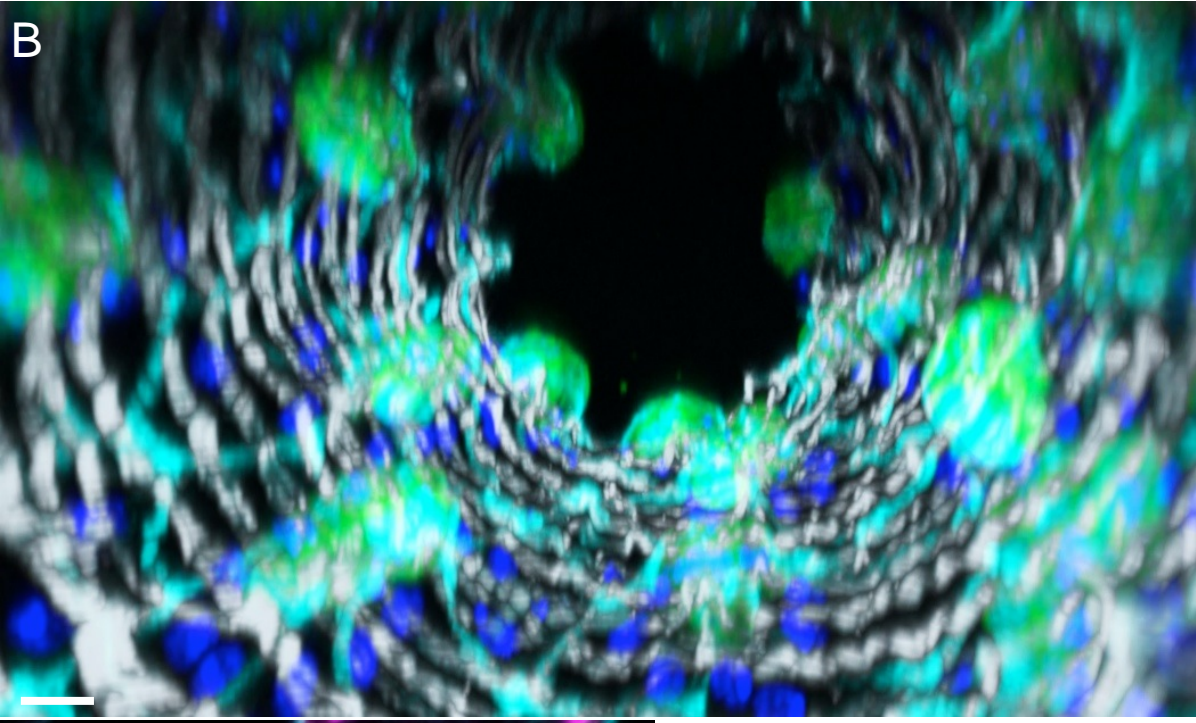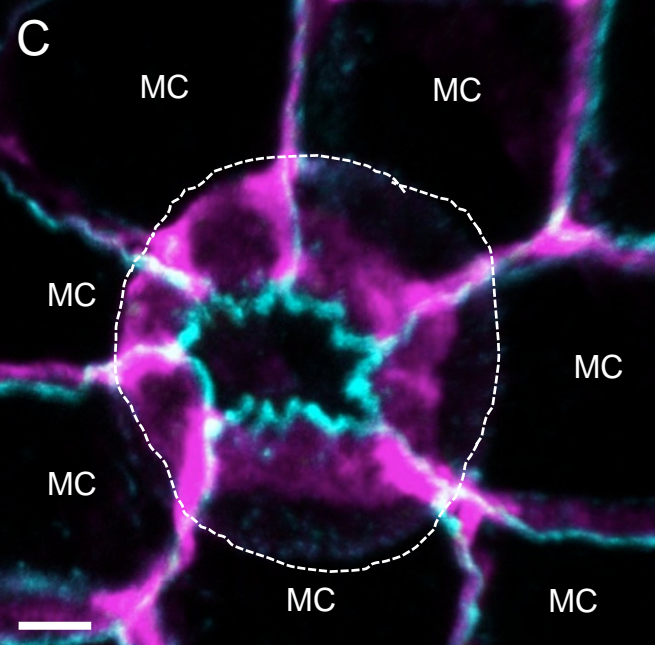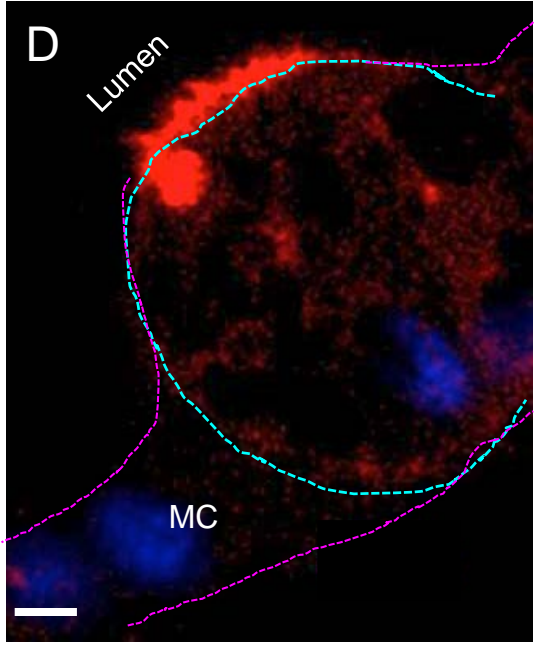

**Fig 2. The Rab3 associated with VLCS**

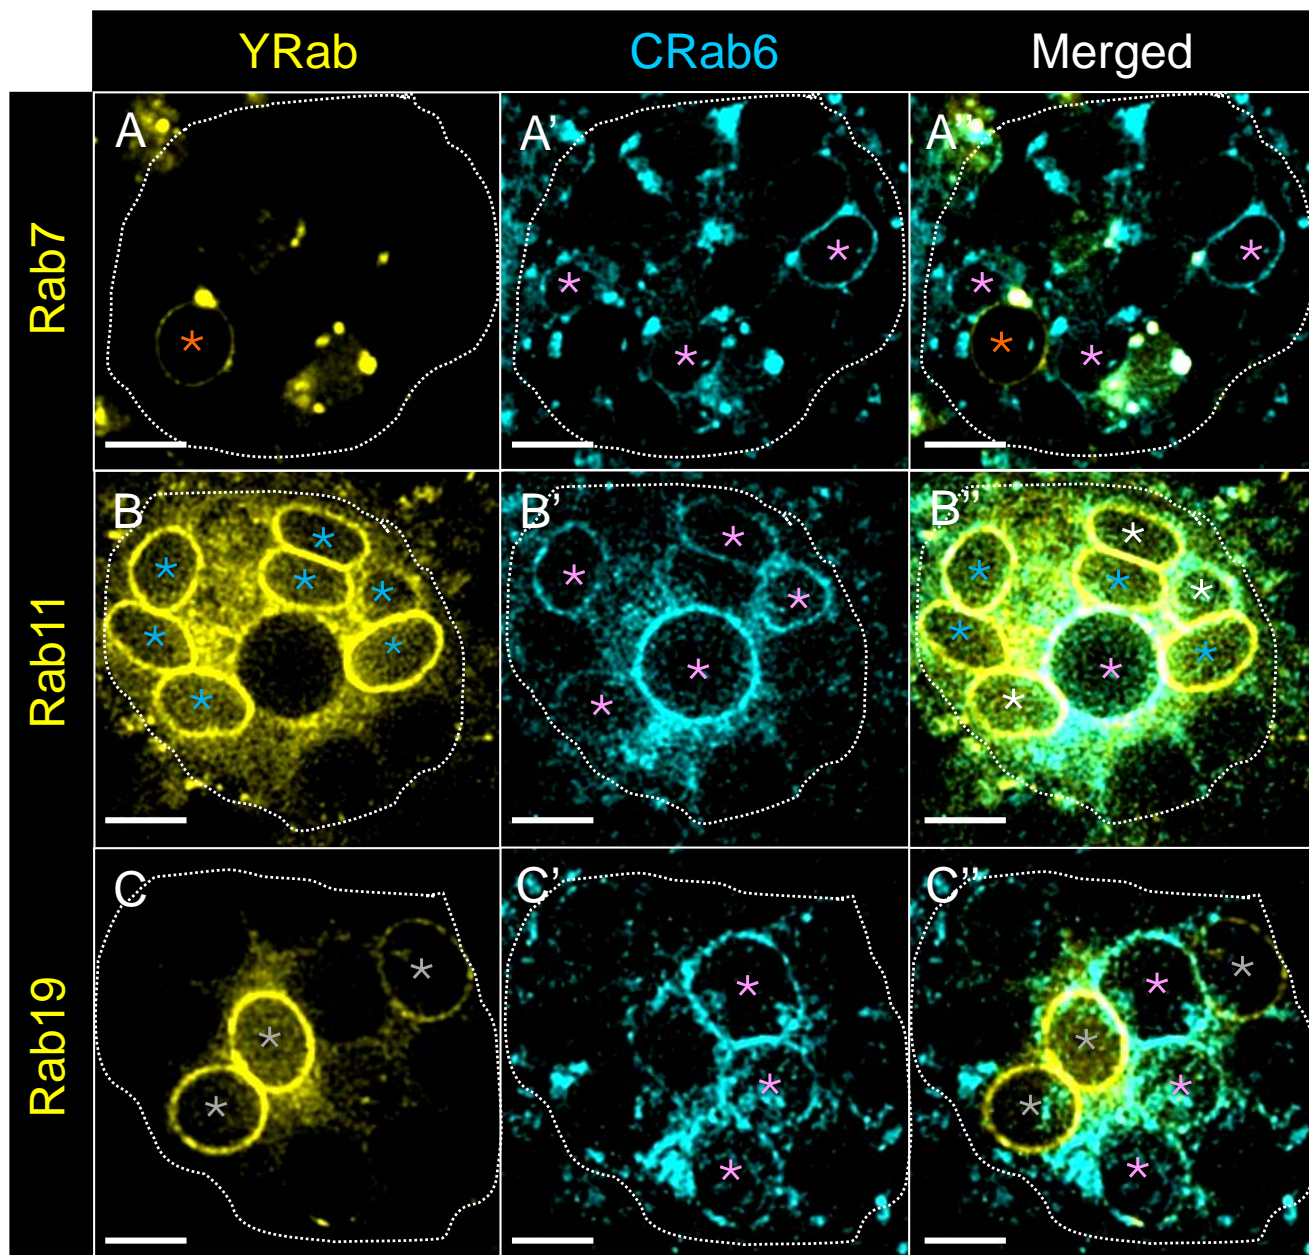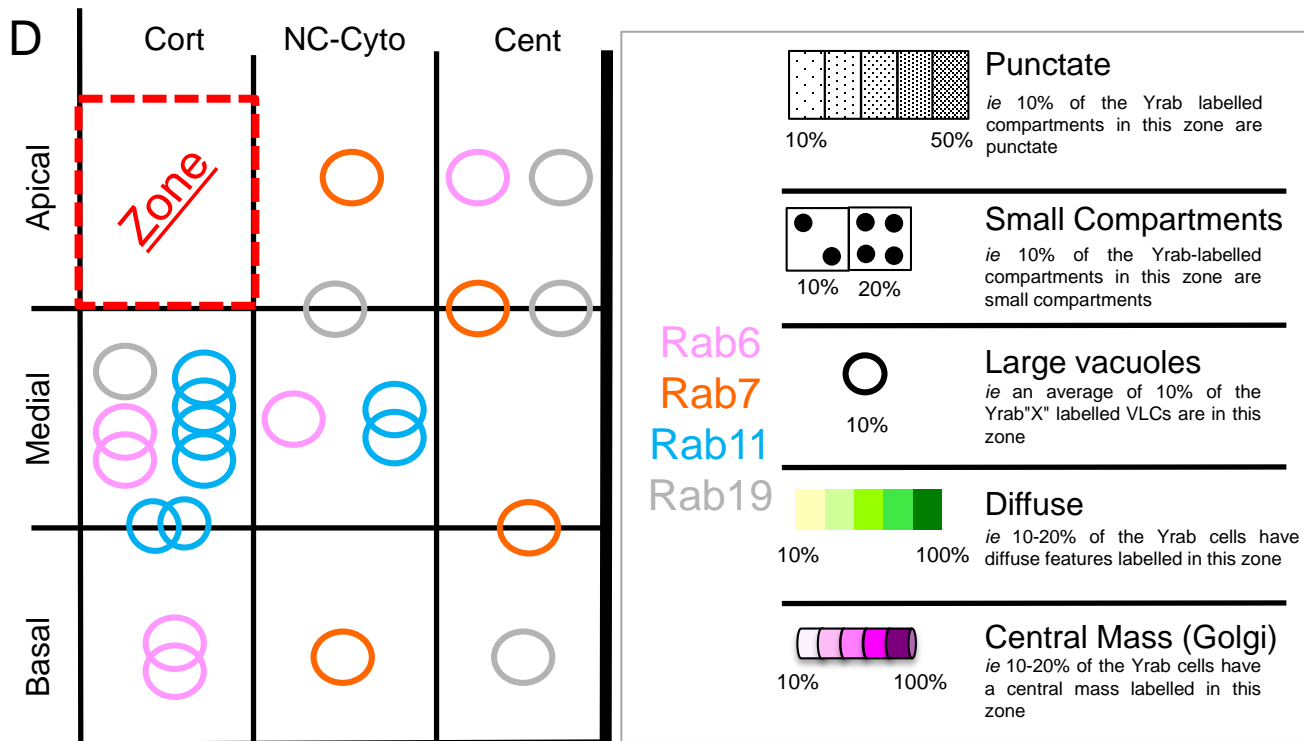

**Fig 3. Organization of Rab6 membranes in the SCs**

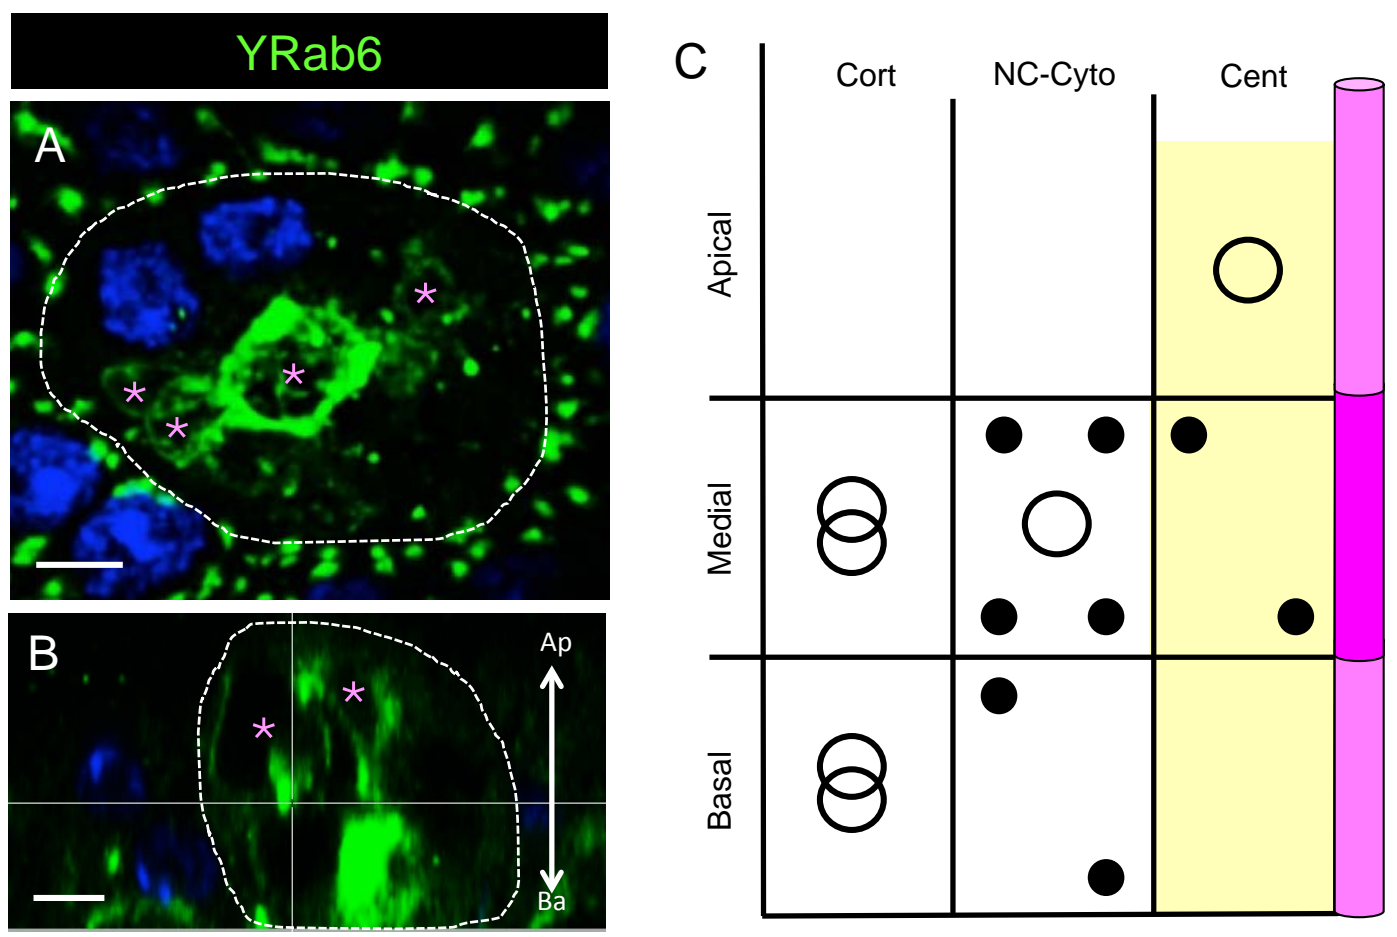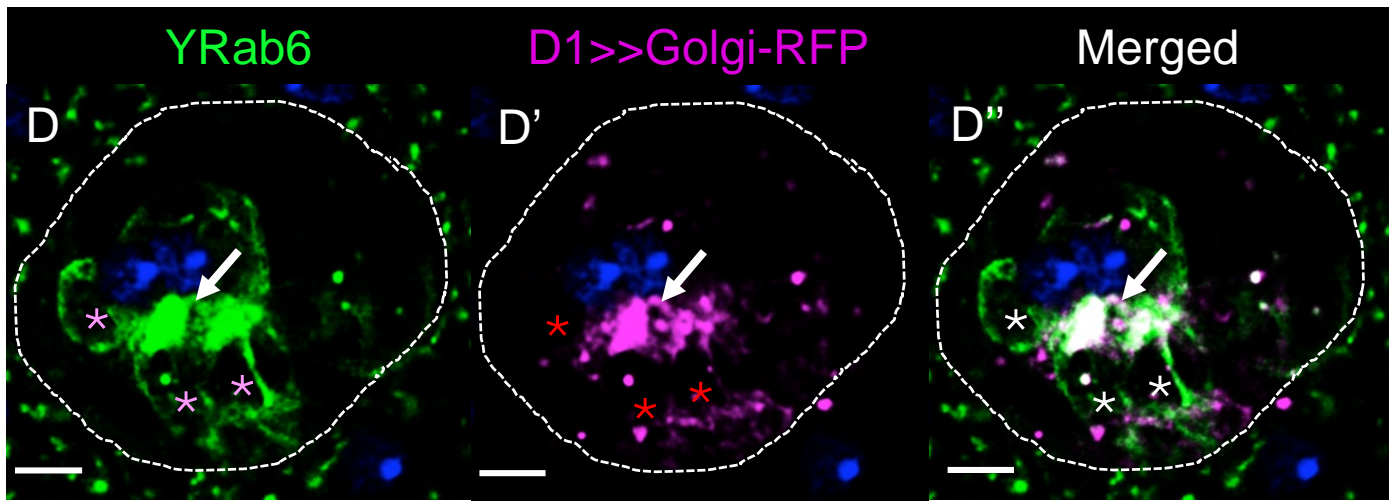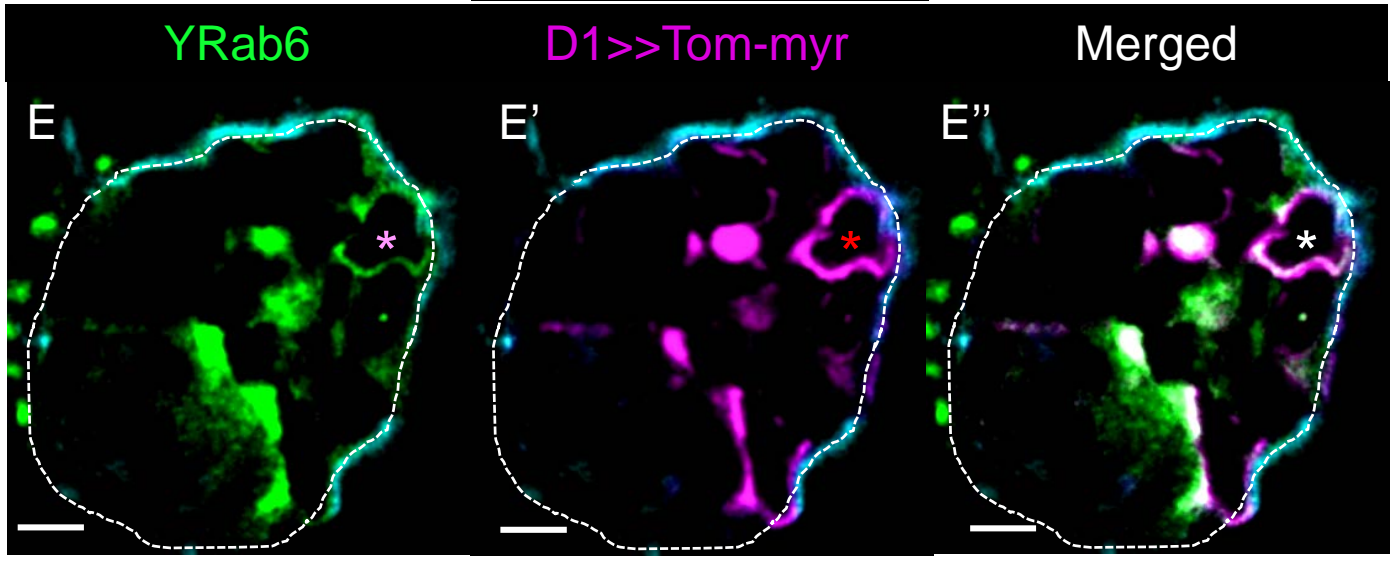

**Fig 4. Organization of Rab19 membranes in the SCs**

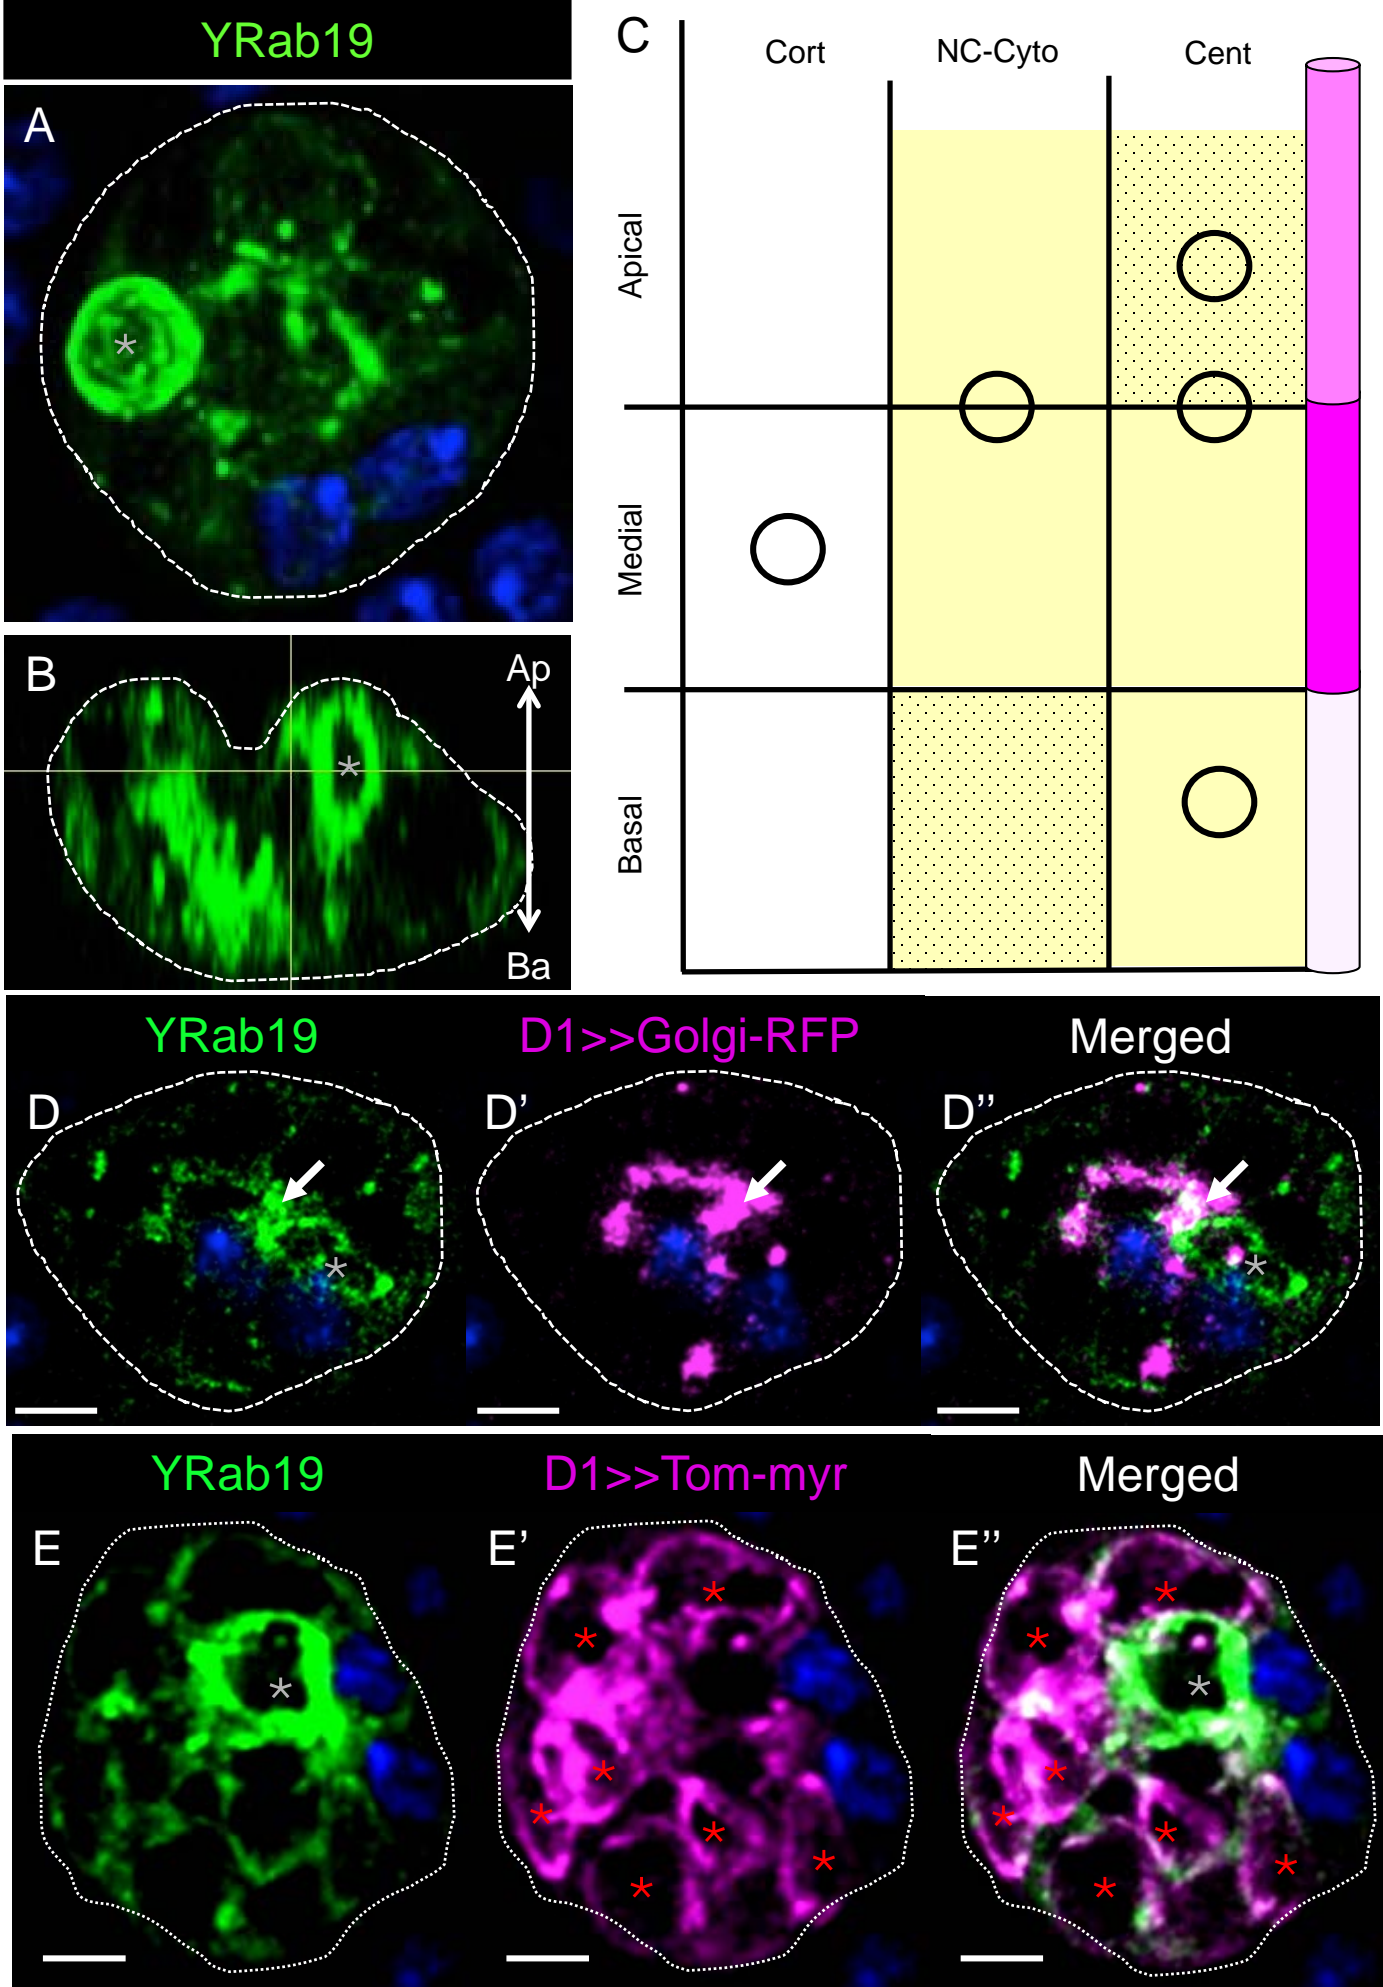

**Fig 5. Organization of Rab11 membranes in the SCs**

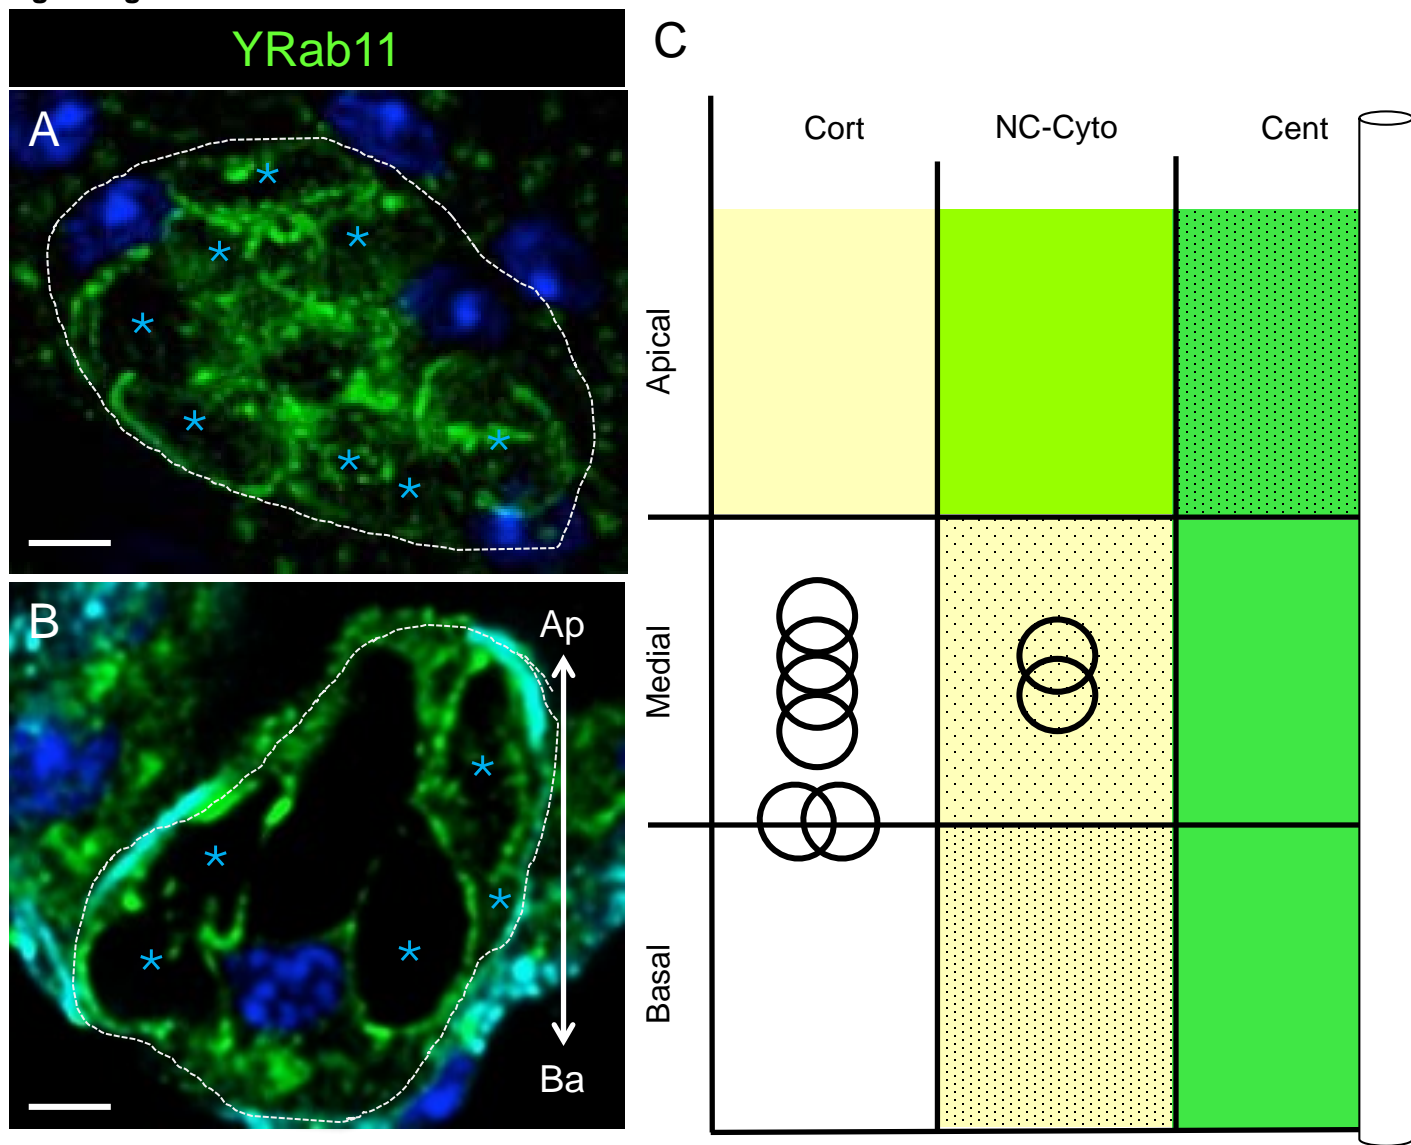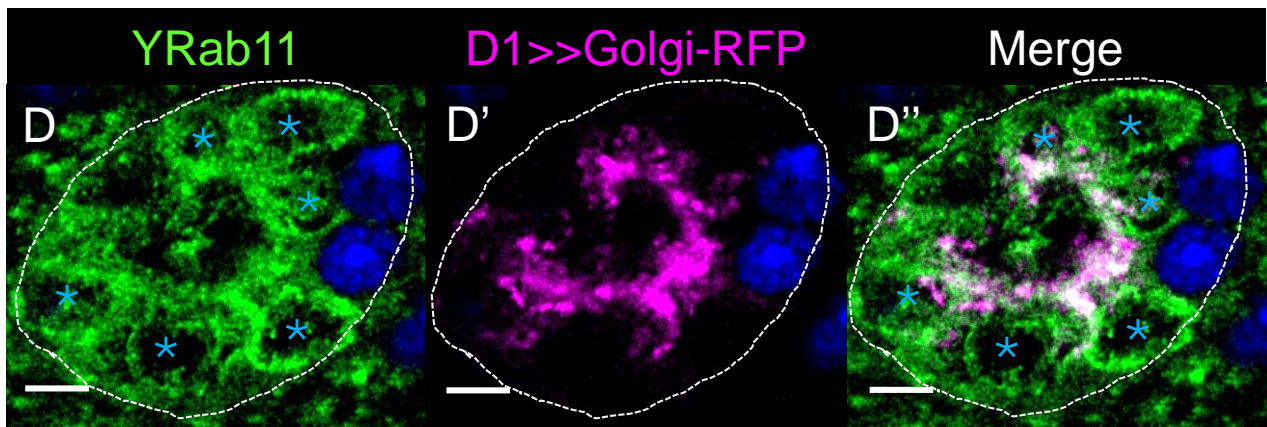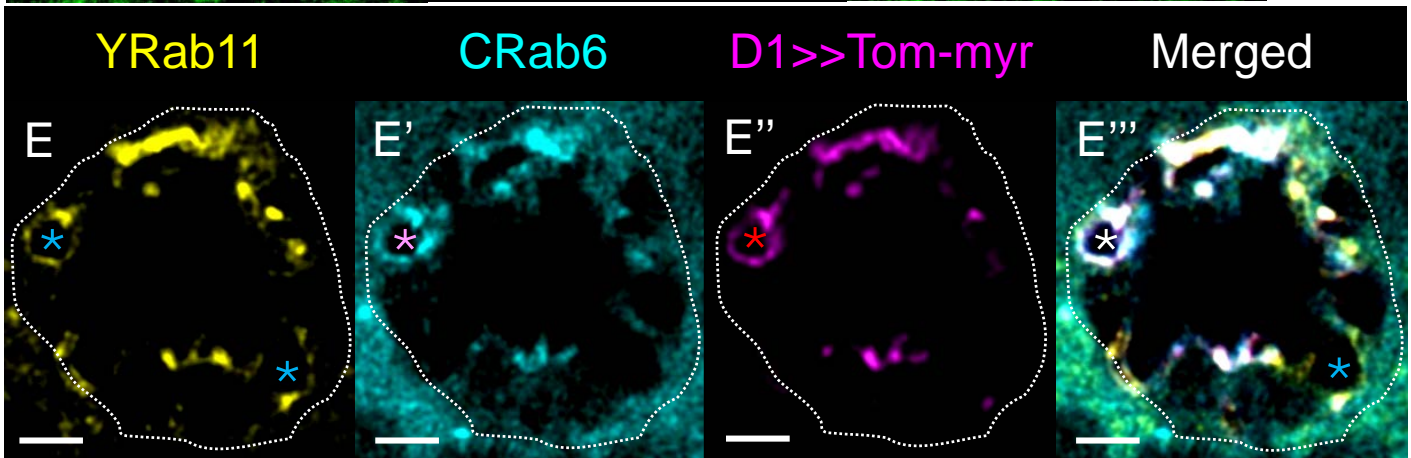



**Fig 6. Rab6 is instructive for VLC formation and the female PMR**

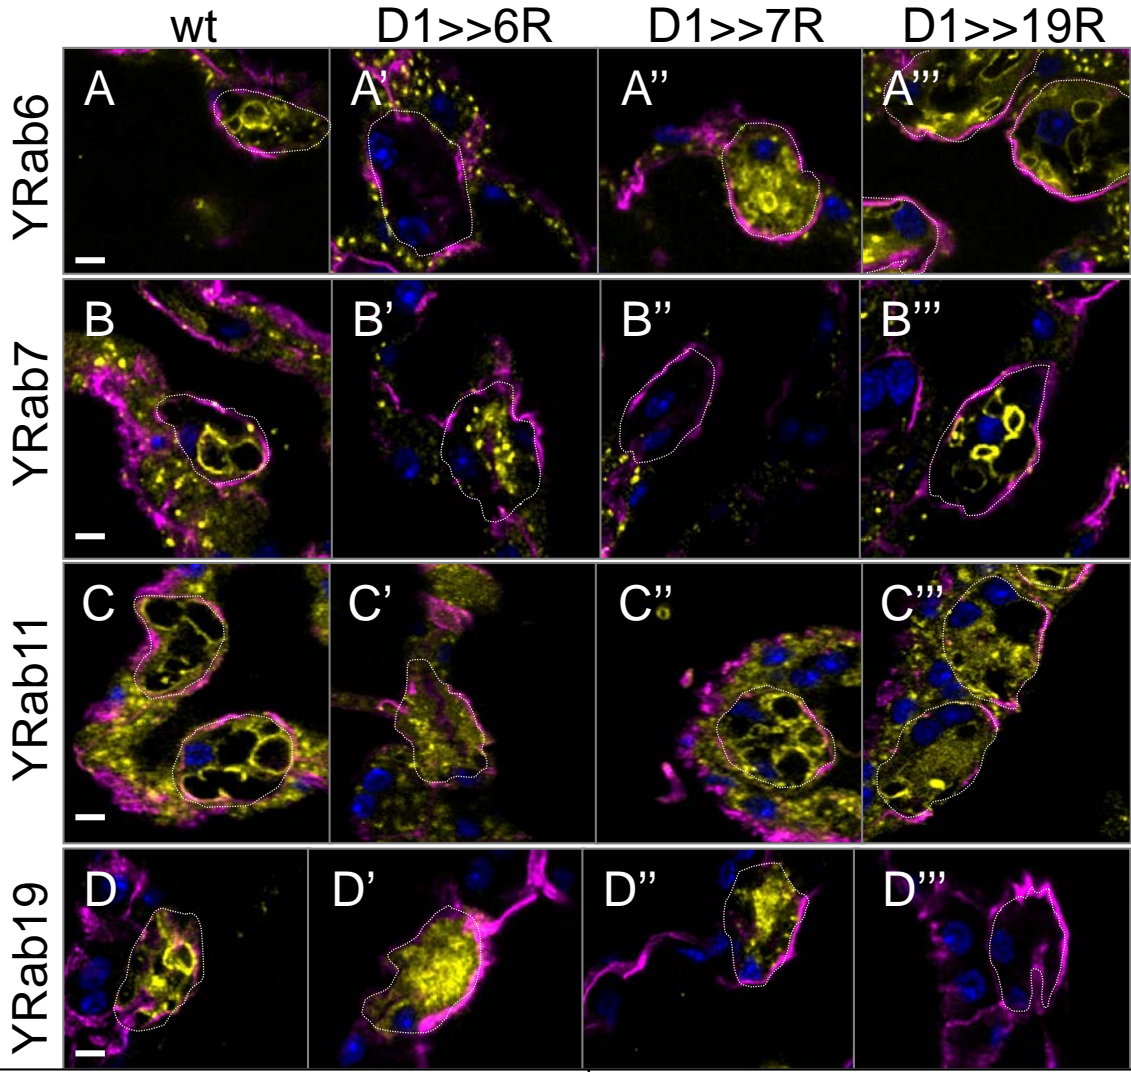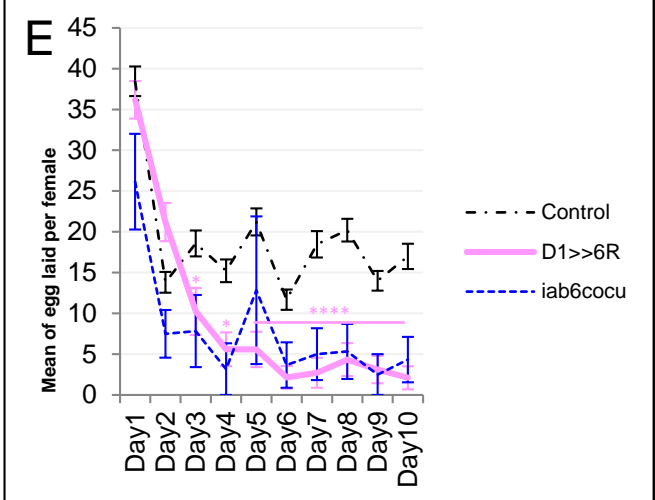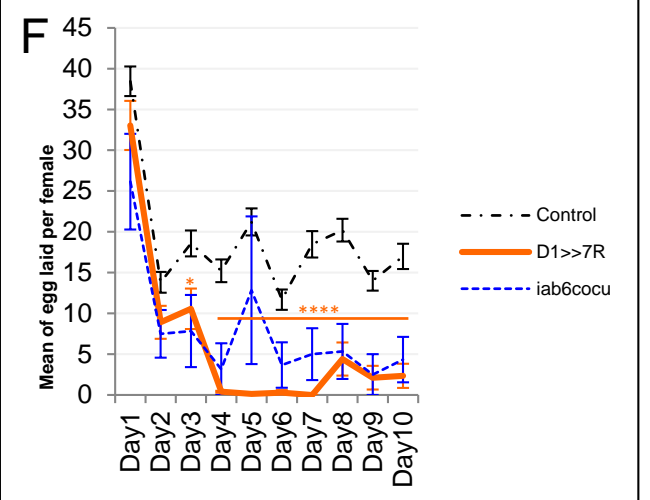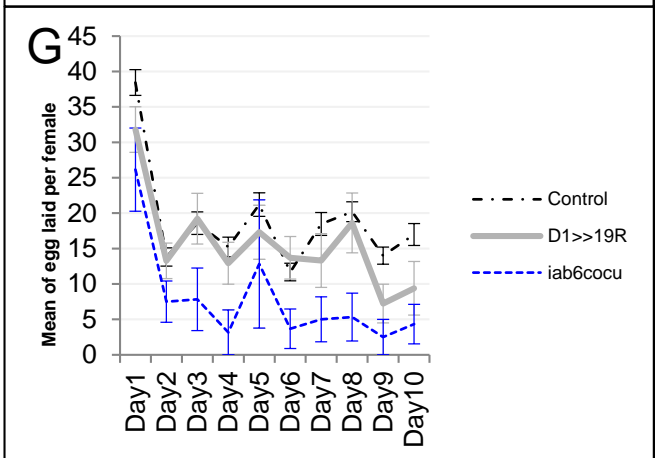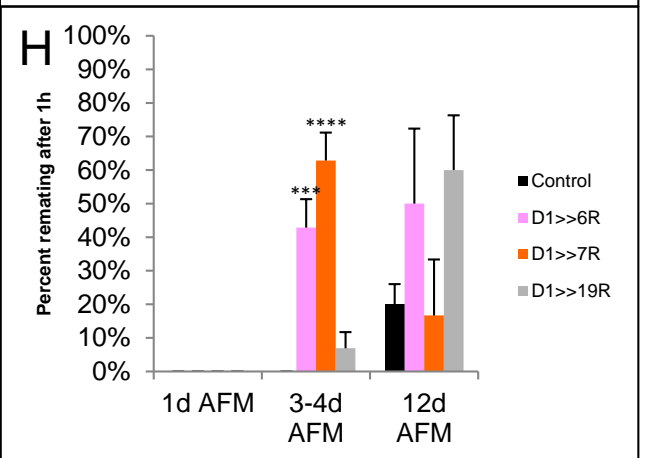

Source: http://biorxiv.org/content/10.1101/266353v1.full.pdf
